# Supplementary material for: Transcriptome Analysis of Clinopodium chinense (Benth.) O. Kuntze and Identification of Genes Involved in Triterpenoid Saponin Biosynthesis
Source: PubMed Central journal article supplement (PMC6600151; doi:10.3390/ijms20112643), 2019-05-29
Supplement: ijms-20-02643-s001.pdf [file ijms-20-02643-s001.pdf]

# Transcriptome analysis of *Clinopodium chinense* (Benth.) O. Kuntze and identification of genes involved in triterpenoid saponin biosynthesis

Yuanyuan Shi<sup>1,2</sup>, Shengxiang Zhang<sup>1,2</sup>, Daiyin Peng<sup>1,3</sup>, Chenkai Wang<sup>1,2</sup>, Derui Zhao<sup>1,2</sup>,  
Kelong Ma<sup>1,4</sup>, Jiawen Wu<sup>1,2,3\*</sup>, Luqi Huang<sup>1,5\*</sup>

<sup>1</sup> Anhui University of Chinese Medicine and Anhui Academy of Chinese Medicine, Hefei 230038, China.

871735748@qq.com (Y.S.); 351038096@qq.com (S.Z.); pengdy@ahtcm.edu.cn (D.P.); 846981810@qq.com  
(C.W.); 920031823@qq.com (D.Z.); 515587551@qq.com (K.M.); wujiawen@ahtcm.edu.cn (J.W.);  
huangluqi01@126.com (L.H.).

<sup>2</sup> Key Laboratory of Xin'an Medicine, Ministry of Education, Anhui University of Chinese Medicine,  
Hefei 230038, China.

<sup>3</sup> Synergetic Innovation Center of Anhui Authentic Chinese Medicine Quality Improvement, Hefei  
230012, China.

<sup>4</sup> Clinical College of Integrated Traditional Chinese and Western Medicine, Anhui University of  
Chinese Medicine.

<sup>5</sup> State Key Laboratory Breeding Base of Dao-di Herbs, National Resource Center for Chinese Materia  
Medica, China Academy of Chinese Medical Sciences, Beijing 100700, China.

\* Corresponding author. Jiawen Wu, Luqi Huang, E-mail address: wujiawen@ahtcm.edu.cn,  
huangluqi01@126.com.

## Supplementary data

Figure S1 Total saponin contents from leaves, stems, and roots of *C. chinense*.

Figure S2 The length distribution of unigenes for *C. chinense* transcriptome assembly.

Figure S3 Annotation and Blast results for the *C. chinense* transcripts and unigenes.

Figure S4 Annotation of unigenes in *C. chinense* using MAPMAN software.

Figure S5 Overview of metabolic pathway mapped with selected unigenes (FPKM > 1) using  
MAPMAN analysis.

Figure S6 Overview of secondary metabolic pathway mapped with selected unigenes (FPKM >  
1) using MAPMAN analysis.

Figure S7 GO function annotation of *C. chinense* unigene.

Figure S8 KEGG function annotation of *C. chinense* unigene.

Figure S9 Terpenoid backbone biosynthesis based on the KEGG database. Red box represents  
enzymes annotated by KEGG database.

Figure S10 Sesquiterpenoid and triterpenoid biosynthesis based on the KEGG database. Red

box represents enzymes annotated by KEGG database.

Figure S11 Steroid biosynthesis based on the KEGG database. Red box represents enzymes annotated by KEGG database.

Figure S12 Model summary of pathways involved in triterpenoid saponin biosynthesis.

Figure S13 Pathway for hormone biosynthesis in *C. chinense* using MAPMAN analysis.

Figure S14 Standard curve of Clinopodiside A at 250 nm.

Table S1 KEGG annotation of all unigenes.

Table S2 Cytochrome P450s annotated in *C. chinense*.

Table S3 Glucosyltransferases annotated in *C. chinense*.

Table S4 Beta amyrin synthase annotated in *C. chinense*.

Table S5 GO terms from biological process ontology for leaf versus root in *C. chinense*.

Table S6 GO terms from biological process ontology for stem versus root in *C. chinense*.

Table S7 GO terms from molecular function ontology for leaf versus root in *C. chinense*.

Table S8 GO terms from molecular function ontology for stem versus root in *C. chinense*.

Table S9 RNA information of different tissues.

Table S10 Genes and primer sequences used for qRT-PCR.

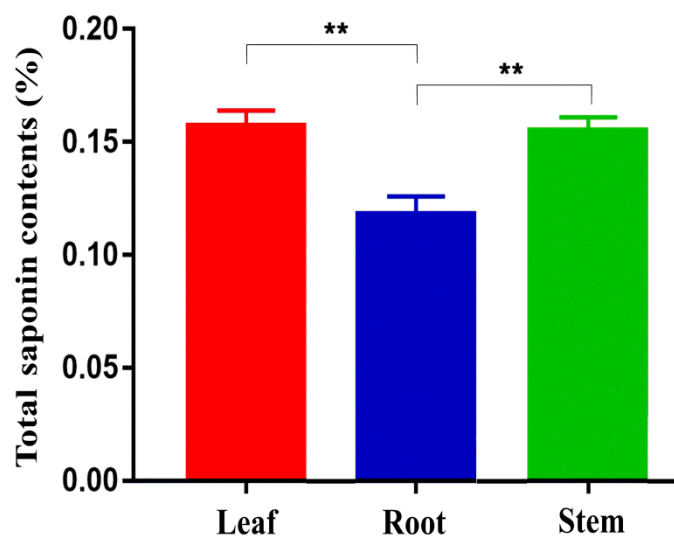

**Supplementary Figure S1** Total saponin contents from leaves, stems, and roots of *C. chinense*.

Total saponin contents of root, leaf, and stem are colored in blue, red, and green, respectively.

\*\* represents p-values less than 0.01, which was defined as a significant difference.

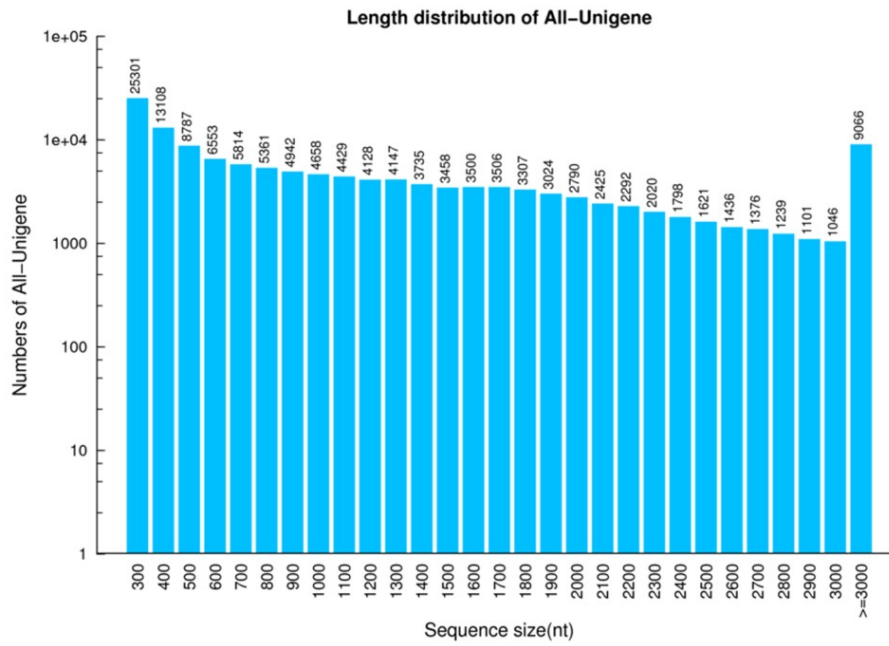

**Supplementary Figure S2** The length distribution of unigenes for *C. chinense* transcriptome assembly.

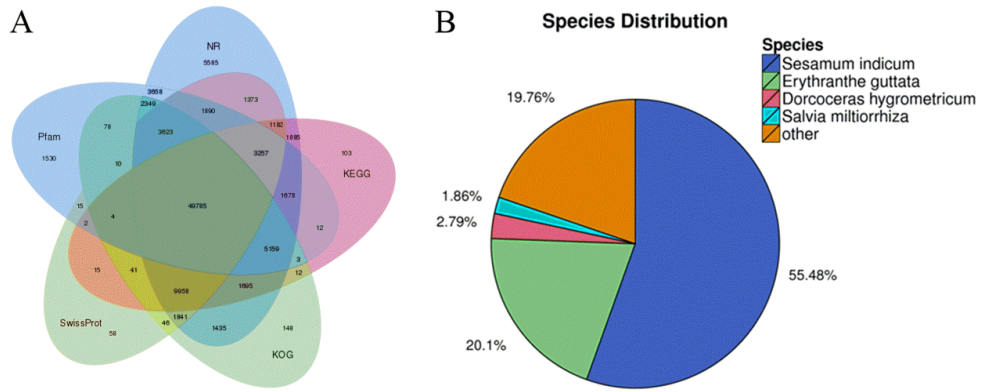

**Supplementary Figure S3** Annotation and Blast results for the *C. chinense* transcripts and unigenes. (A) Transcripts and unigenes of *C. chinense* were annotated to the NR, KEGG, KOG, Swiss-Prot and Pfam databases. (B) The species distribution of *C. chinense* in NR database.

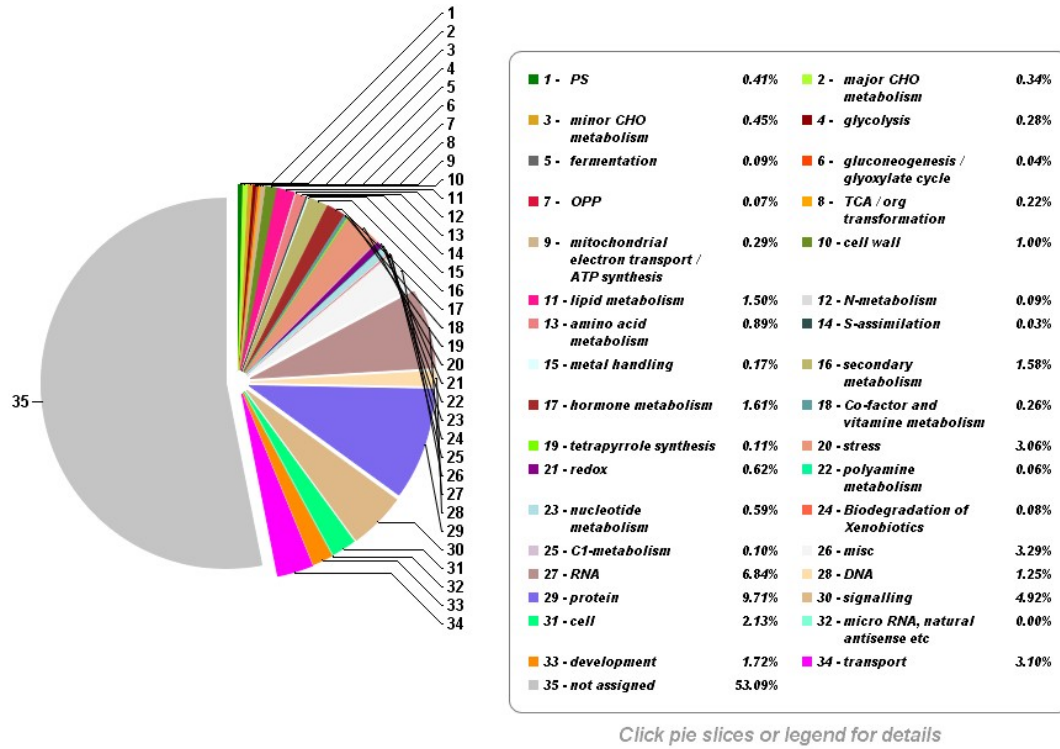

**Supplementary Figure S4** Annotation of unigenes in *C. chinense* using MAPMAN software. Different metabolic pathways are shown in different colors. The annotated proportion of pathways are shown in the fan-shaped area.

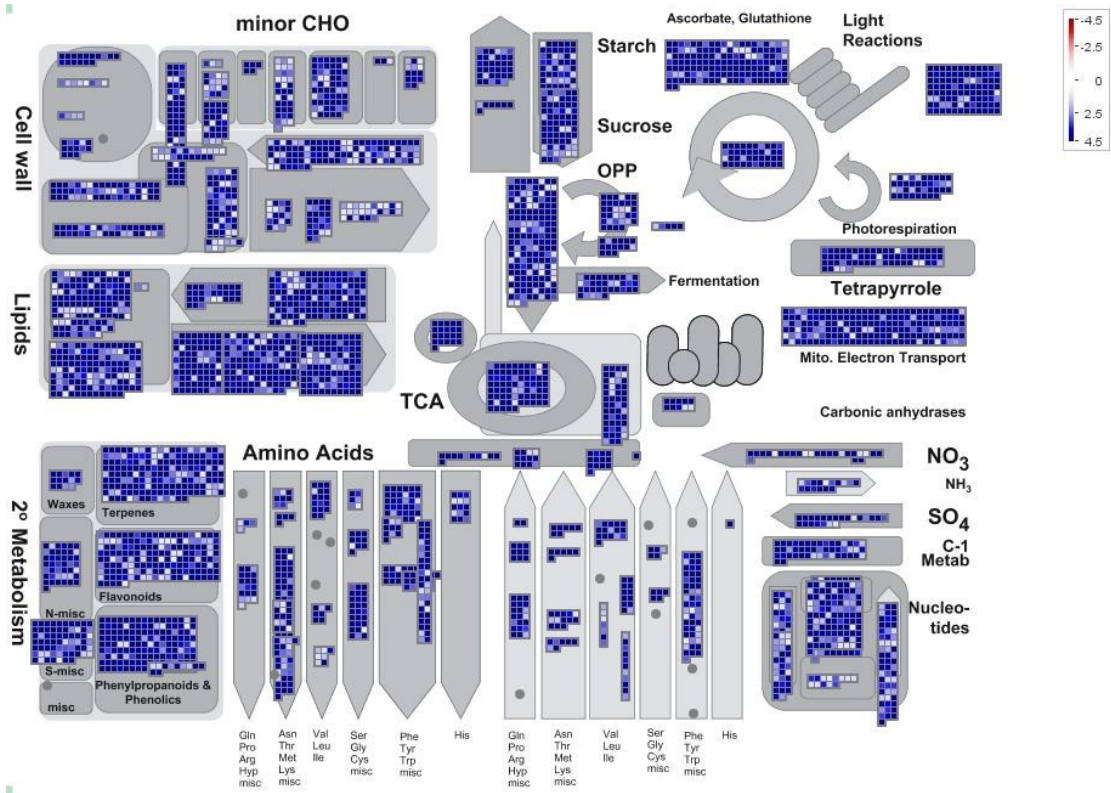

**Supplementary Figure S5:** Overview of metabolic pathway mapped with selected unigenes (FPKM > 1) using MAPMAN analysis. Blue and red represent high and low expression levels, respectively.

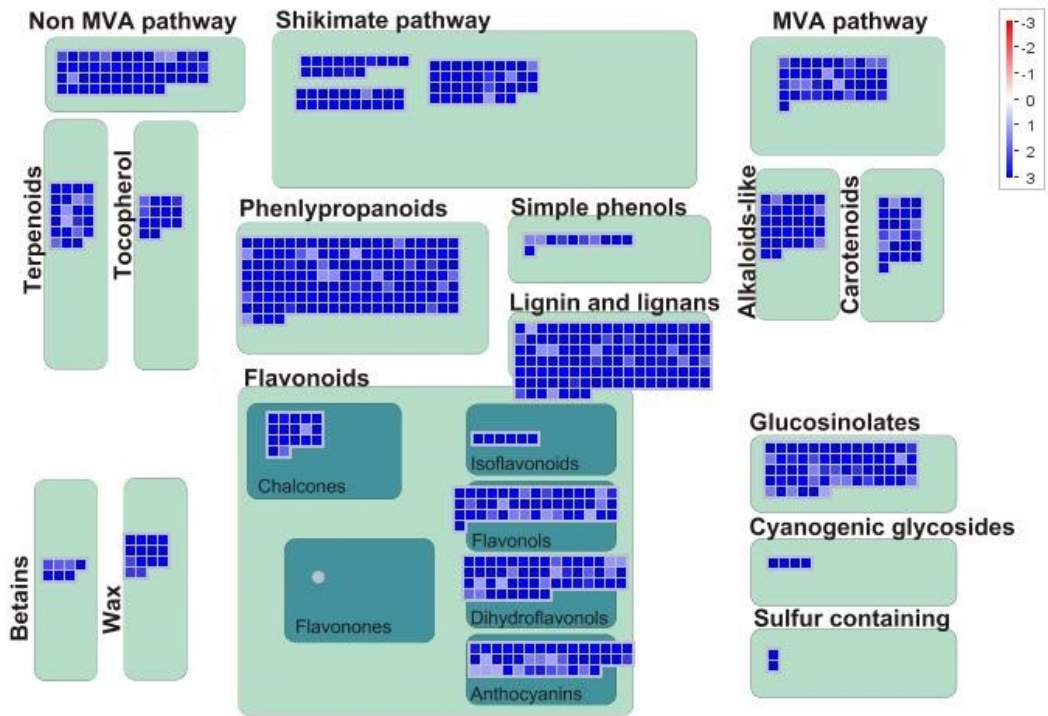

**Supplementary Figure S6:** Overview of secondary metabolic pathway mapped with selected unigenes (FPKM > 1) using MAPMAN analysis. Blue and red represent high and low expression levels, respectively.



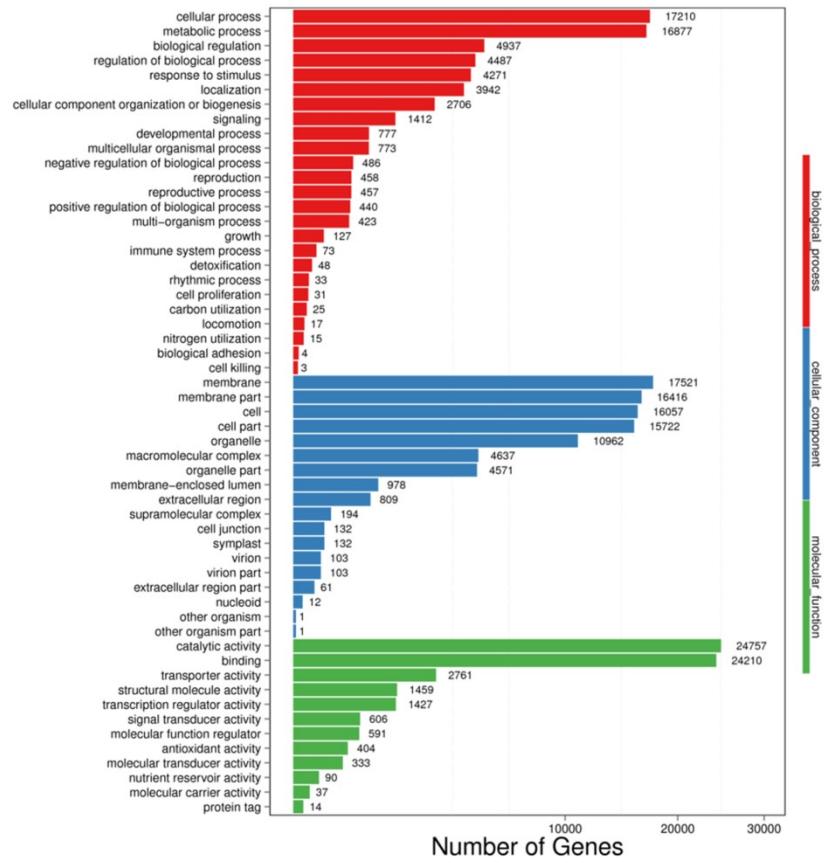

**Supplementary Figure S7** GO function annotation of *C. chinense* unigenes. The annotated unigenes were described using GO terms and divided into three classes, biological process, cellular component, and molecular function, colored in red, blue, and green, respectively.

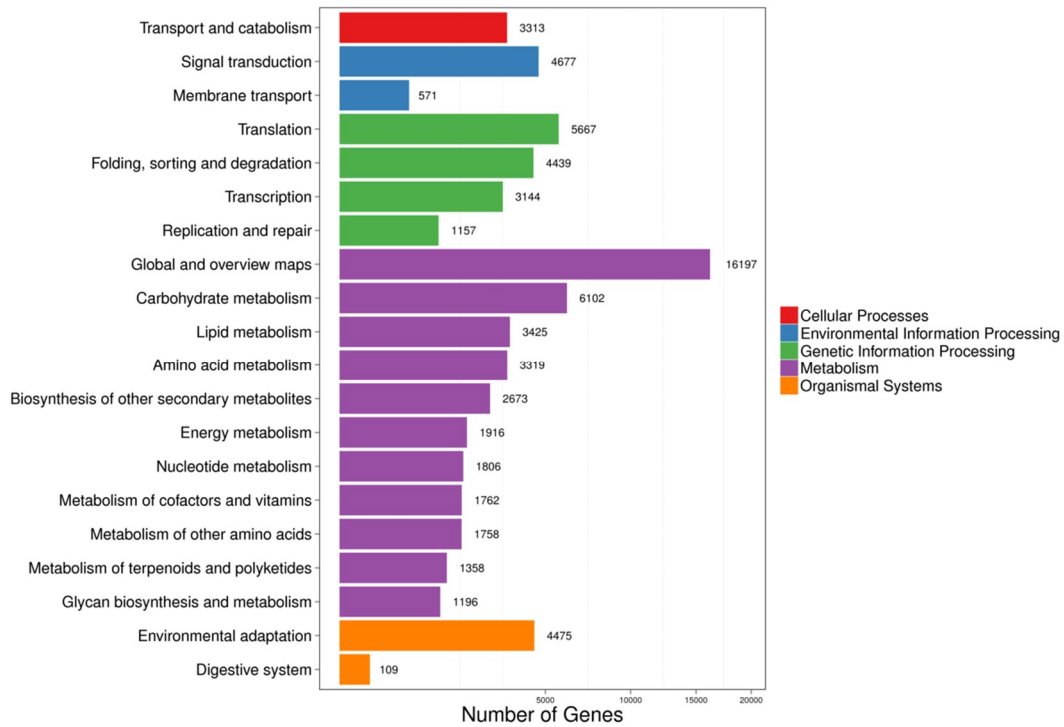

**Supplementary Figure S8** KEGG function annotation of *C. chinense* unigenes. The annotated unigenes were mapped to the KEGG database and classified into five categories, cellular process, genetic information processing, metabolism, organismal systems, and environmental information processing, colored in red, green, purple, orange, and blue, respectively.

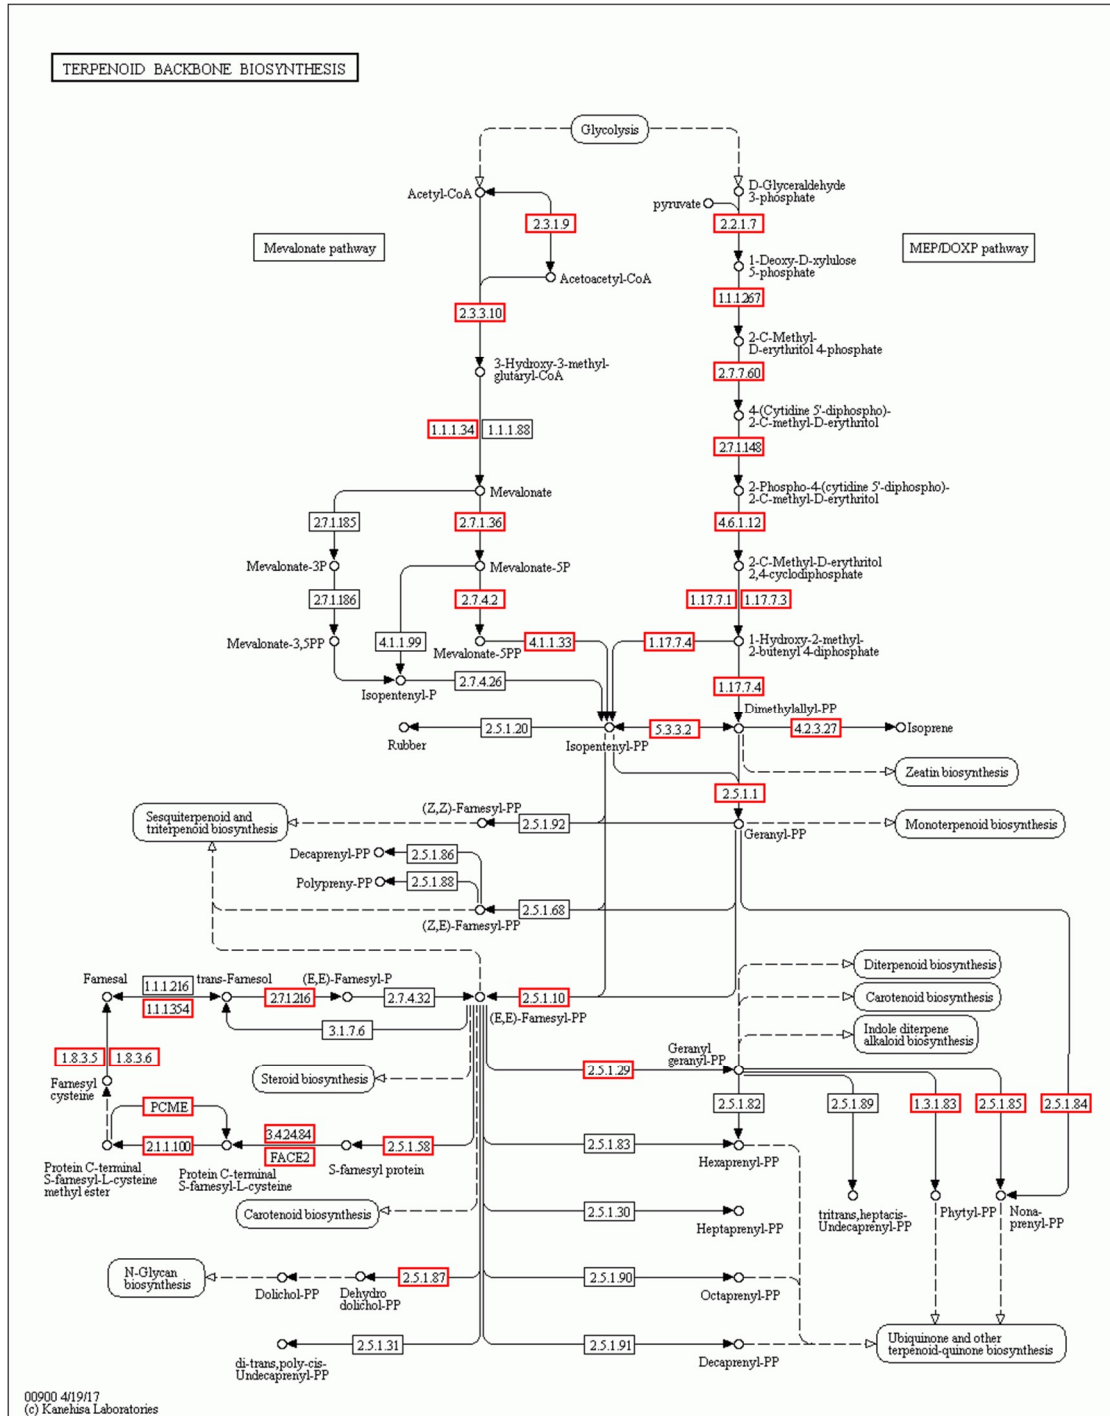

**Supplementary Figure S9** Terpenoid backbone biosynthesis based on the KEGG database.

Red box represents enzymes annotated by KEGG database.

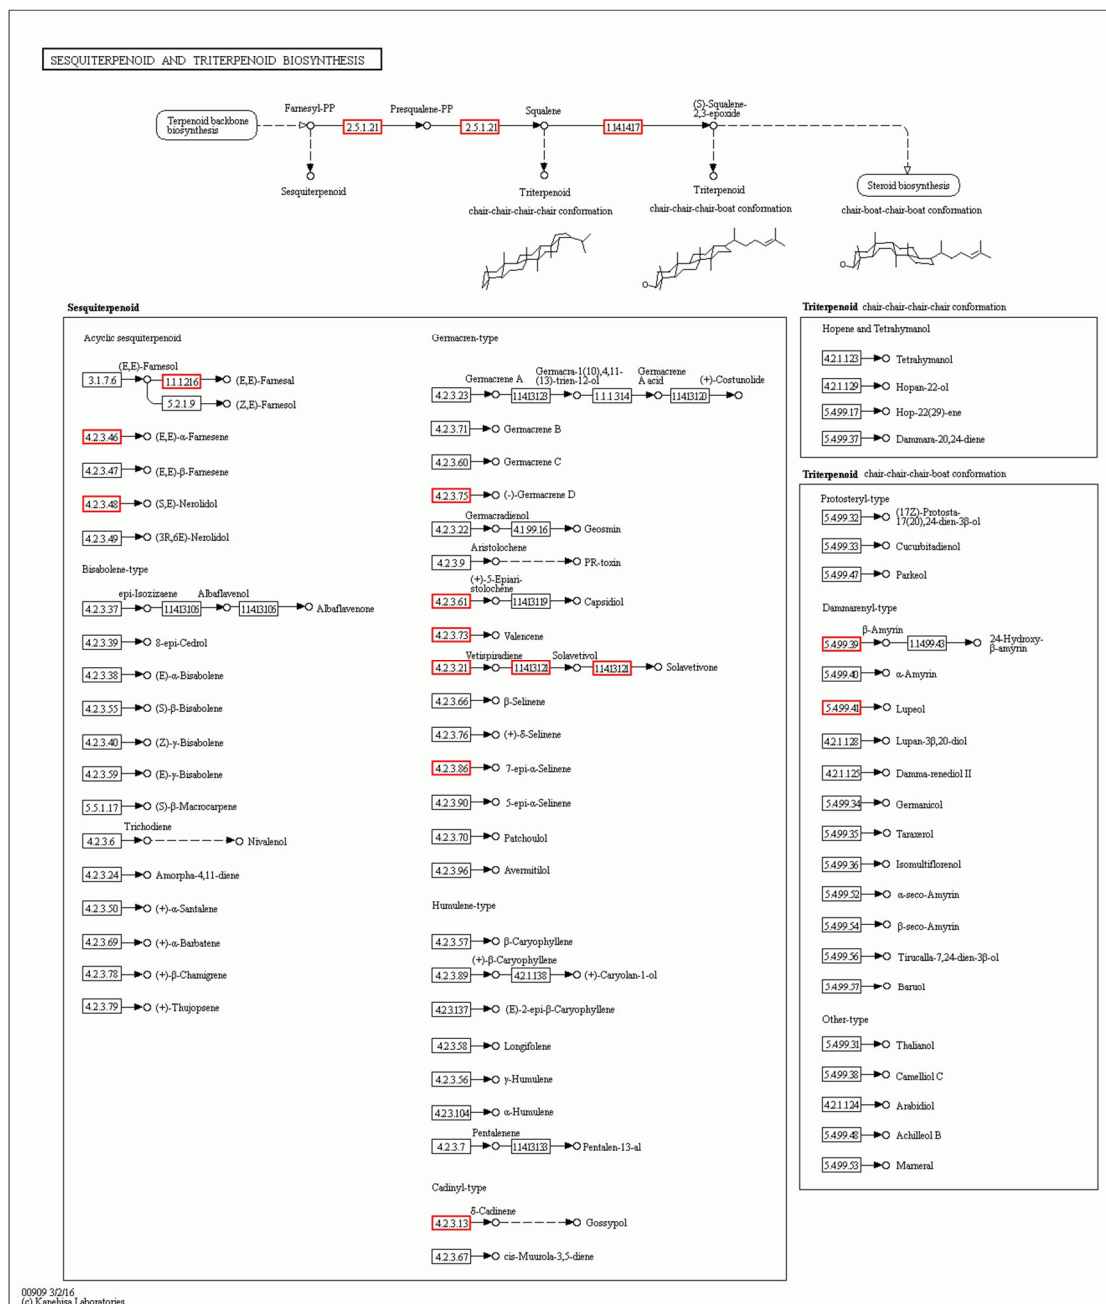

**Supplementary Figure S10** Sesquiterpenoid and triterpenoid biosynthesis based on the KEGG database. Red box represents enzymes annotated by KEGG database.

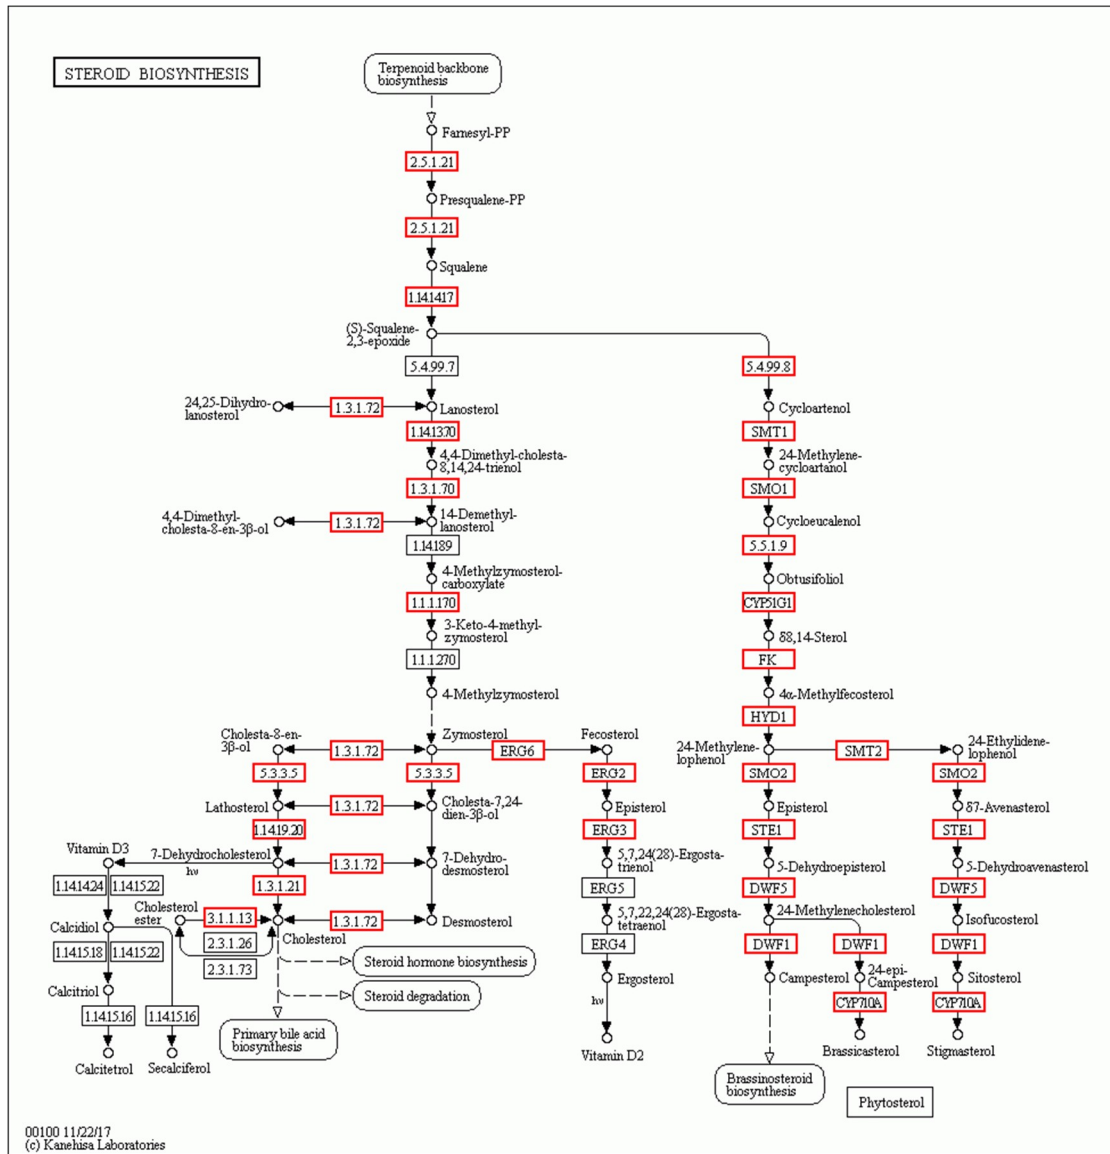

**Supplementary Figure S11** Steroid biosynthesis based on the KEGG database. Red box represents enzymes annotated by KEGG database.

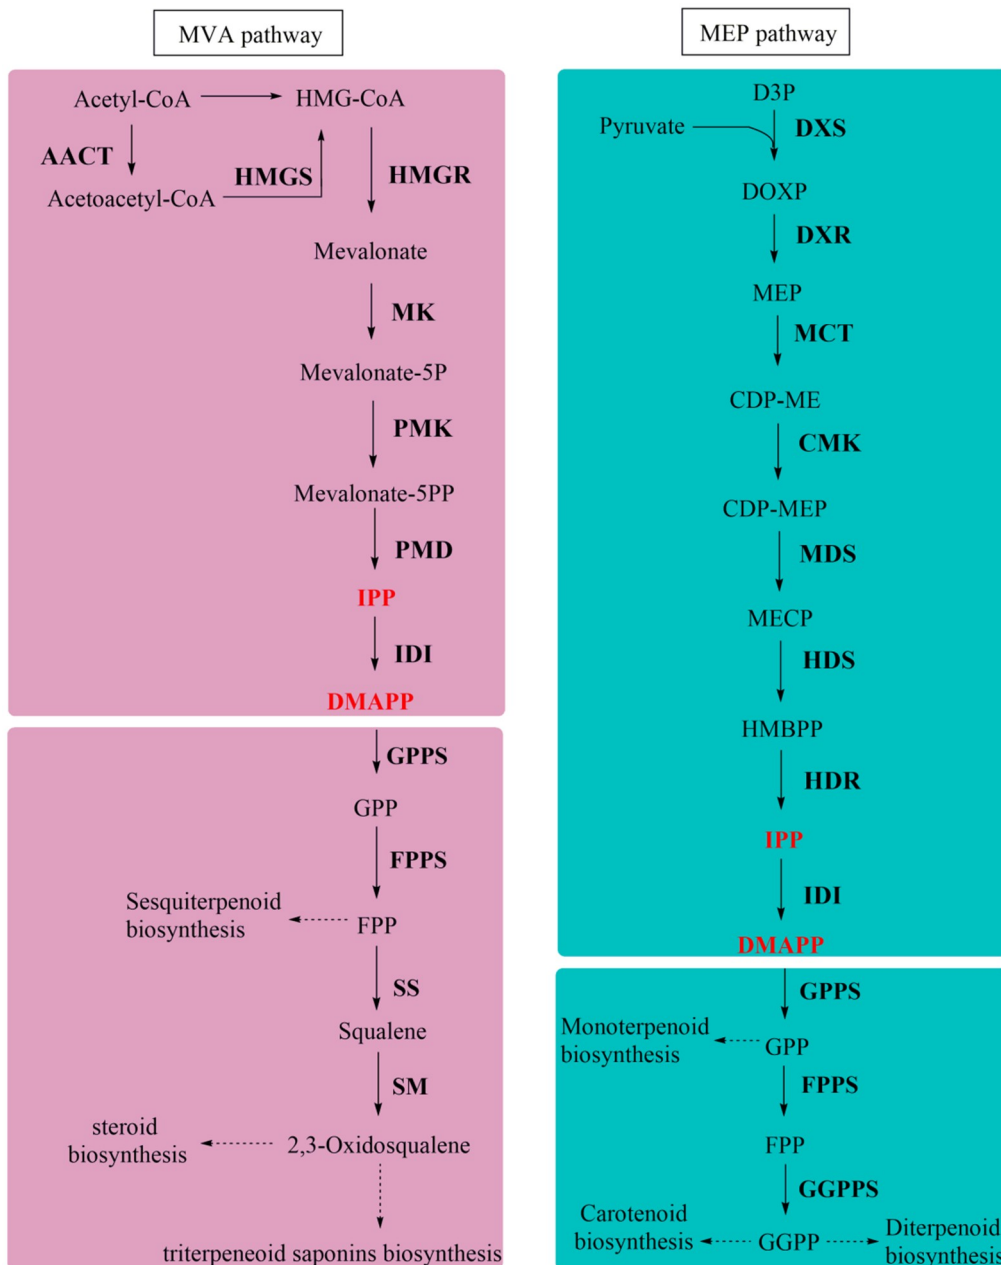

**Supplementary Figure S12** Model summary of pathways involved in triterpenoid saponin biosynthesis. Triterpenoid saponins are synthesized by the MVA pathway in cytoplasm and mitochondria (shown in purple) or the MEP pathway in plastids (shown in blue). IPP and DMAPP (shown in red) are the precursors of isoprenoids, including monoterpenoids, sesquiterpenoids, diterpenoids, triterpenoid saponins, steroids and carotenoids.

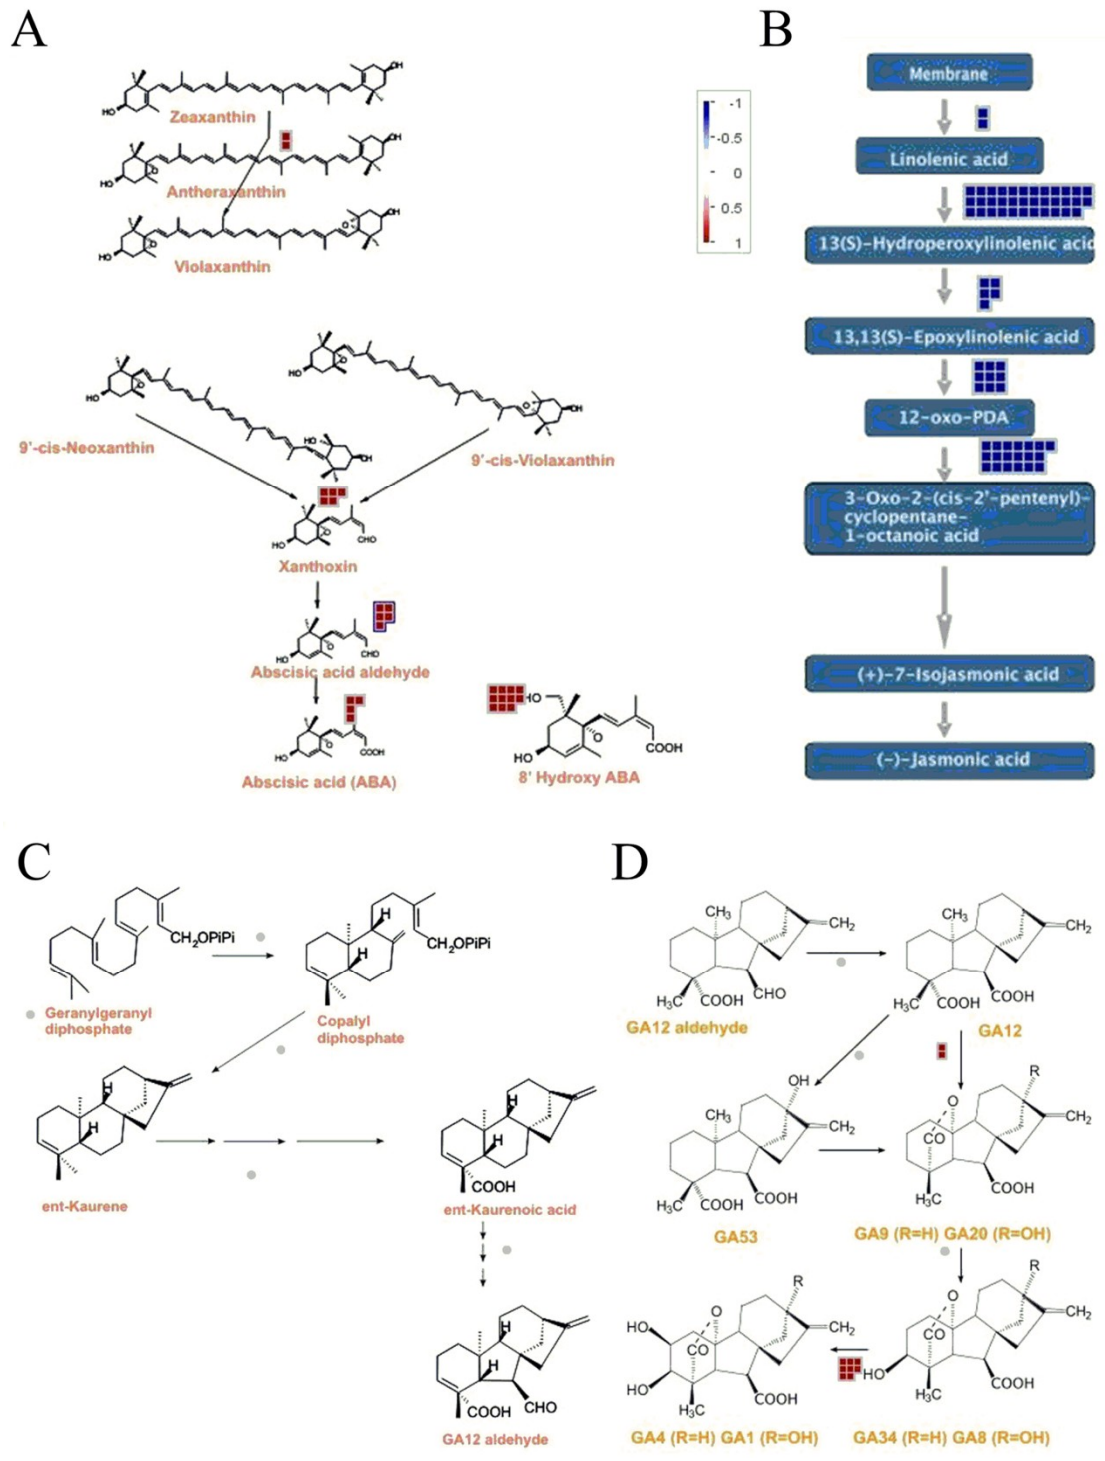

**Supplementary Figure S13** Pathway for hormone biosynthesis in *C. chinense* using MAPMAN analysis. (A) Pathway for abscisic acid (ABA) biosynthesis. (B) Pathway for jasmonate (JA) biosynthesis. (C) and (D) Pathway for gibberellin (GA) biosynthesis.

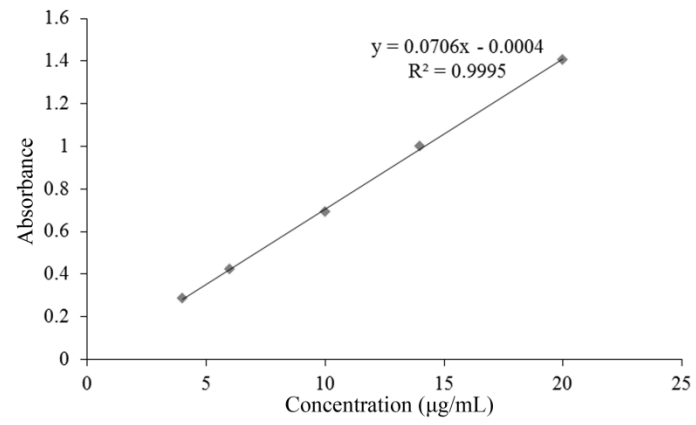

**Supplementary Figure S14** Standard curve of Clinopodiside A at 250 nm.



**Supplementary Table S1** KEGG annotation of unigenes.

| Pathway                                     | Unigene number | Pathway ID |
|---------------------------------------------|----------------|------------|
| Metabolic pathways                          | 15096 (20.18%) | ko01100    |
| Biosynthesis of secondary metabolites       | 8307 (11.11%)  | ko01110    |
| Plant-pathogen interaction                  | 3925 (5.25%)   | ko04626    |
| MAPK signaling pathway - plant              | 2522 (3.37%)   | ko04016    |
| Plant hormone signal transduction           | 2407 (3.22%)   | ko04075    |
| RNA transport                               | 2090 (2.79%)   | ko03013    |
| Spliceosome                                 | 2026 (2.71%)   | ko03040    |
| Ribosome                                    | 1831 (2.45%)   | ko03010    |
| Endocytosis                                 | 1787 (2.39%)   | ko04144    |
| Protein processing in endoplasmic reticulum | 1746 (2.33%)   | ko04141    |
| Biosynthesis of amino acids                 | 1669 (2.23%)   | ko01230    |
| Phenylpropanoid biosynthesis                | 1655 (2.21%)   | ko00940    |
| Starch and sucrose metabolism               | 1622 (2.17%)   | ko00500    |
| Carbon metabolism                           | 1593 (2.13%)   | ko01200    |
| Purine metabolism                           | 1503 (2.01%)   | ko00230    |
| mRNA surveillance pathway                   | 1391 (1.86%)   | ko03015    |
| Pyrimidine metabolism                       | 1324 (1.77%)   | ko00240    |
| Ubiquitin mediated proteolysis              | 1169 (1.56%)   | ko04120    |
| RNA degradation                             | 993 (1.33%)    | ko03018    |
| Amino sugar and nucleotide sugar metabolism | 962 (1.29%)    | ko00520    |
| Glycolysis / Gluconeogenesis                | 872 (1.17%)    | ko00010    |
| Glycerophospholipid metabolism              | 818 (1.09%)    | ko00564    |
| Galactose metabolism                        | 811 (1.08%)    | ko00052    |
| Peroxisome                                  | 780 (1.04%)    | ko04146    |
| Glycerolipid metabolism                     | 779 (1.04%)    | ko00561    |
| RNA polymerase                              | 774 (1.03%)    | ko03020    |
| Phosphatidylinositol signaling system       | 704 (0.94%)    | ko04070    |
| Oxidative phosphorylation                   | 703 (0.94%)    | ko00190    |
| Cysteine and methionine metabolism          | 657 (0.88%)    | ko00270    |
| Ribosome biogenesis in eukaryotes           | 638 (0.85%)    | ko03008    |
| Pentose and glucuronate interconversions    | 629 (0.84%)    | ko00040    |
| Pyruvate metabolism                         | 602 (0.8%)     | ko00620    |
| Ascorbate and aldarate metabolism           | 602 (0.8%)     | ko00053    |
| Phagosome                                   | 595 (0.8%)     | ko04145    |
| Glutathione metabolism                      | 582 (0.78%)    | ko00480    |

---

|                                                     |             |         |
|-----------------------------------------------------|-------------|---------|
| Inositol phosphate metabolism                       | 581 (0.78%) | ko00562 |
| ABC transporters                                    | 571 (0.76%) | ko02010 |
| Cyanoamino acid metabolism                          | 560 (0.75%) | ko00460 |
| Circadian rhythm - plant                            | 550 (0.74%) | ko04712 |
| Fatty acid metabolism                               | 529 (0.71%) | ko01212 |
| Aminoacyl-tRNA biosynthesis                         | 506 (0.68%) | ko00970 |
| Arginine and proline metabolism                     | 477 (0.64%) | ko00330 |
| Flavonoid biosynthesis                              | 468 (0.63%) | ko00941 |
| Sphingolipid metabolism                             | 465 (0.62%) | ko00600 |
| Nucleotide excision repair                          | 449 (0.6%)  | ko03420 |
| Tryptophan metabolism                               | 448 (0.6%)  | ko00380 |
| Glyoxylate and dicarboxylate metabolism             | 446 (0.6%)  | ko00630 |
| Valine, leucine and isoleucine degradation          | 431 (0.58%) | ko00280 |
| Fatty acid degradation                              | 428 (0.57%) | ko00071 |
| 2-Oxocarboxylic acid metabolism                     | 423 (0.57%) | ko01210 |
| Pentose phosphate pathway                           | 417 (0.56%) | ko00030 |
| Carbon fixation in photosynthetic organisms         | 417 (0.56%) | ko00710 |
| Glycine, serine and threonine metabolism            | 412 (0.55%) | ko00260 |
| N-Glycan biosynthesis                               | 409 (0.55%) | ko00510 |
| Fructose and mannose metabolism                     | 409 (0.55%) | ko00051 |
| Homologous recombination                            | 399 (0.53%) | ko03440 |
| Phenylalanine, tyrosine and tryptophan biosynthesis | 386 (0.52%) | ko00400 |
| Alanine, aspartate and glutamate metabolism         | 384 (0.51%) | ko00250 |
| alpha-Linolenic acid metabolism                     | 382 (0.51%) | ko00592 |
| Basal transcription factors                         | 363 (0.49%) | ko03022 |
| DNA replication                                     | 361 (0.48%) | ko03030 |
| Phenylalanine metabolism                            | 361 (0.48%) | ko00360 |
| Tyrosine metabolism                                 | 358 (0.48%) | ko00350 |
| Lysine degradation                                  | 356 (0.48%) | ko00310 |
| beta-Alanine metabolism                             | 352 (0.47%) | ko00410 |
| Terpenoid backbone biosynthesis                     | 345 (0.46%) | ko00900 |
| Proteasome                                          | 341 (0.46%) | ko03050 |
| Other glycan degradation                            | 337 (0.45%) | ko00511 |
| Ubiquinone and other terpenoid-quinone biosynthesis | 335 (0.45%) | ko00130 |
| Protein export                                      | 322 (0.43%) | ko03060 |
| Carotenoid biosynthesis                             | 315 (0.42%) | ko00906 |
| Base excision repair                                | 310 (0.41%) | ko03410 |
| Citrate cycle (TCA cycle)                           | 308 (0.41%) | ko00020 |

---

---

|                                                        |             |         |
|--------------------------------------------------------|-------------|---------|
| Arginine biosynthesis                                  | 307 (0.41%) | ko00220 |
| Biosynthesis of unsaturated fatty acids                | 305 (0.41%) | ko01040 |
| Arachidonic acid metabolism                            | 302 (0.4%)  | ko00590 |
| Ether lipid metabolism                                 | 300 (0.4%)  | ko00565 |
| Nitrogen metabolism                                    | 297 (0.4%)  | ko00910 |
| Porphyrin and chlorophyll metabolism                   | 283 (0.38%) | ko00860 |
| Mismatch repair                                        | 272 (0.36%) | ko03430 |
| Propanoate metabolism                                  | 267 (0.36%) | ko00640 |
| Diterpenoid biosynthesis                               | 267 (0.36%) | ko00904 |
| Stilbenoid, diarylheptanoid and gingerol biosynthesis  | 252 (0.34%) | ko00945 |
| Photosynthesis                                         | 247 (0.33%) | ko00195 |
| Autophagy - other                                      | 240 (0.32%) | ko04136 |
| Sulfur metabolism                                      | 240 (0.32%) | ko00920 |
| Pantothenate and CoA biosynthesis                      | 234 (0.31%) | ko00770 |
| Isoquinoline alkaloid biosynthesis                     | 230 (0.31%) | ko00950 |
| Linoleic acid metabolism                               | 229 (0.31%) | ko00591 |
| Fatty acid biosynthesis                                | 221 (0.3%)  | ko00061 |
| Glycosaminoglycan degradation                          | 216 (0.29%) | ko00531 |
| SNARE interactions in vesicular transport              | 213 (0.28%) | ko04130 |
| Steroid biosynthesis                                   | 197 (0.26%) | ko00100 |
| Indole alkaloid biosynthesis                           | 197 (0.26%) | ko00901 |
| Folate biosynthesis                                    | 194 (0.26%) | ko00790 |
| Glycosylphosphatidylinositol (GPI)-anchor biosynthesis | 192 (0.26%) | ko00563 |
| Cutin, suberine and wax biosynthesis                   | 190 (0.25%) | ko00073 |
| Selenocompound metabolism                              | 184 (0.25%) | ko00450 |
| Fatty acid elongation                                  | 183 (0.24%) | ko00062 |
| Tropane, piperidine and pyridine alkaloid biosynthesis | 179 (0.24%) | ko00960 |
| Nicotinate and nicotinamide metabolism                 | 170 (0.23%) | ko00760 |
| Butanoate metabolism                                   | 169 (0.23%) | ko00650 |
| Sesquiterpenoid and triterpenoid biosynthesis          | 166 (0.22%) | ko00909 |
| Glycosphingolipid biosynthesis - ganglio series        | 159 (0.21%) | ko00604 |
| Histidine metabolism                                   | 155 (0.21%) | ko00340 |
| Valine, leucine and isoleucine biosynthesis            | 149 (0.2%)  | ko00290 |
| Isoflavonoid biosynthesis                              | 141 (0.19%) | ko00943 |
| Riboflavin metabolism                                  | 141 (0.19%) | ko00740 |
| Other types of O-glycan biosynthesis                   | 135 (0.18%) | ko00514 |
| One carbon pool by folate                              | 135 (0.18%) | ko00670 |
| Zeatin biosynthesis                                    | 115 (0.15%) | ko00908 |

---

---

|                                                            |             |         |
|------------------------------------------------------------|-------------|---------|
| Anthocyanin biosynthesis                                   | 114 (0.15%) | ko00942 |
| Vitamin B6 metabolism                                      | 114 (0.15%) | ko00750 |
| Monoterpenoid biosynthesis                                 | 111 (0.15%) | ko00902 |
| Cholesterol metabolism                                     | 109 (0.15%) | ko04979 |
| Thiamine metabolism                                        | 107 (0.14%) | ko00730 |
| Biotin metabolism                                          | 107 (0.14%) | ko00780 |
| Flavone and flavonol biosynthesis                          | 105 (0.14%) | ko00944 |
| Phosphonate and phosphinate metabolism                     | 95 (0.13%)  | ko00440 |
| Glycosphingolipid biosynthesis - globo and isoglobo series | 89 (0.12%)  | ko00603 |
| C5-Branched dibasic acid metabolism                        | 80 (0.11%)  | ko00660 |
| Brassinosteroid biosynthesis                               | 78 (0.1%)   | ko00905 |
| Lysine biosynthesis                                        | 78 (0.1%)   | ko00300 |
| Glucosinolate biosynthesis                                 | 78 (0.1%)   | ko00966 |
| Monobactam biosynthesis                                    | 71 (0.09%)  | ko00261 |
| Sulfur relay system                                        | 63 (0.08%)  | ko04122 |
| Taurine and hypotaurine metabolism                         | 60 (0.08%)  | ko00430 |
| Photosynthesis - antenna proteins                          | 59 (0.08%)  | ko00196 |
| Benzoxazinoid biosynthesis                                 | 58 (0.08%)  | ko00402 |
| Synthesis and degradation of ketone bodies                 | 54 (0.07%)  | ko00072 |
| Non-homologous end-joining                                 | 49 (0.07%)  | ko03450 |
| Betalain biosynthesis                                      | 44 (0.06%)  | ko00965 |
| Mannose type O-glycan biosynthesis                         | 21 (0.03%)  | ko00515 |
| Lipoic acid metabolism                                     | 17 (0.02%)  | ko00785 |
| Caffeine metabolism                                        | 11 (0.01%)  | ko00232 |
| Glycosphingolipid biosynthesis - lacto and neolacto series | 11 (0.01%)  | ko00601 |

---

**Supplementary Table S2** Cytochrome P450s annotated in *C. chinense*.

| Query_id        | Subject_id     | Identity | E_value  | Subject_annotation                        |
|-----------------|----------------|----------|----------|-------------------------------------------|
| Unigene5892     | XP_012852863.1 | 64.04    | 2.4E-194 | cytochrome P450 [Theobroma cacao]         |
| Unigene61313    | AGN04218.1     | 64.31    | 1.1E-122 | cytochrome P450 [Salvia miltiorrhiza]     |
| CL10076.Contig2 | KZV21240.1     | 67.69    | 3.2E-199 | cytochrome P450 89A2 [Sesamum indicum]    |
| CL11607.Contig1 | XP_012850388.1 | 88.44    | 2.2E-171 | cytochrome P450 [Ocimum basilicum]        |
| CL12037.Contig2 | XP_012074684.1 | 85.66    | 2.9E-266 | cytochrome P450 98A2 [Jatropha curcas]    |
| CL12037.Contig3 | XP_012074684.1 | 86.77    | 3.8E-266 | cytochrome P450 98A2 [Jatropha curcas]    |
| CL13058.Contig1 | AOW42546.1     | 69.7     | 3.8E-204 | cytochrome P450 76AK8 [Salvia rosmarinus] |
| CL14718.Contig2 | AOW42546.1     | 65.81    | 2.1E-192 | cytochrome P450 76AK8 [Salvia rosmarinus] |
| CL3121.Contig1  | XP_011072254.1 | 83.46    | 6.6E-259 | cytochrome P450 734A1 [Sesamum indicum]   |
| CL3121.Contig2  | XP_012856870.1 | 70.08    | 6.8E-37  | cytochrome P450 734A1 [Sesamum indicum]   |
| CL3121.Contig3  | XP_011072254.1 | 80.83    | 1.3E-179 | cytochrome P450 734A1 [Sesamum indicum]   |
| CL3121.Contig4  | XP_012856870.1 | 86.13    | 1E-83    | cytochrome P450 734A1 [Sesamum indicum]   |
| CL15636.Contig1 | XP_011093610.1 | 76.82    | 1.1E-213 | cytochrome P450 716B1 [Sesamum indicum]   |
| CL15636.Contig2 | XP_011097890.1 | 76       | 1.1E-42  | cytochrome P450 716B1 [Sesamum indicum]   |
| CL1630.Contig10 | XP_012853592.1 | 64.12    | 3.2E-143 | cytochrome P450 [Theobroma cacao]         |
| CL1630.Contig14 | XP_012853592.1 | 63.06    | 3.9E-192 | cytochrome P450 [Theobroma cacao]         |
| CL1630.Contig15 | XP_012853592.1 | 63.44    | 3.5E-193 | cytochrome P450 [Theobroma cacao]         |
| CL1630.Contig17 | XP_012853592.1 | 63.32    | 5.8E-193 | cytochrome P450 [Theobroma cacao]         |
| CL1630.Contig6  | XP_012853592.1 | 63.58    | 5.4E-194 | cytochrome P450 [Theobroma cacao]         |
| CL1630.Contig9  | XP_012853592.1 | 63.06    | 1.5E-191 | cytochrome P450 [Theobroma cacao]         |
| CL16808.Contig2 | XP_010252185.1 | 60.81    | 2.1E-170 | cytochrome P450 [Macleaya cordata]        |
| CL3302.Contig7  | GAX81290.1     | 27.41    | 9.7E-38  | cytochrome P450 711A1 [Ananas comosus]    |
| CL3790.Contig1  | XP_011070085.1 | 62.89    | 4.6E-183 | cytochrome P450 94A1 [Sesamum indicum]    |

|                 |                |       |          |                                           |
|-----------------|----------------|-------|----------|-------------------------------------------|
| CL3790.Contig2  | XP_011070085.1 | 63.48 | 1.4E-183 | cytochrome P450 94A1 [Sesamum indicum]    |
| Unigene7648     | BAS30379.1     | 61.31 | 3.3E-127 | cytochrome P450 [Ajuga reptans]           |
| Unigene38195    | AAL99201.1     | 87.38 | 3.2E-159 | cytochrome P450 98A2 [Sesamum indicum]    |
| CL7066.Contig3  | AGN04218.1     | 64    | 5E-183   | cytochrome P450 [Salvia miltiorrhiza]     |
| CL7066.Contig4  | AGN04218.1     | 64.81 | 4.3E-187 | cytochrome P450 [Salvia miltiorrhiza]     |
| CL7066.Contig7  | AGN04218.1     | 64.85 | 4.5E-192 | cytochrome P450 [Salvia miltiorrhiza]     |
| CL7066.Contig8  | AGN04218.1     | 64.62 | 5.8E-187 | cytochrome P450 [Salvia miltiorrhiza]     |
| CL7066.Contig9  | AGN04218.1     | 67.09 | 4.2E-193 | cytochrome P450 [Salvia miltiorrhiza]     |
| CL4153.Contig10 | AFZ40057.1     | 86.22 | 2E-203   | cytochrome P450 [Ocimum basilicum]        |
| CL4153.Contig6  | AEX07772.1     | 81.55 | 1.3E-239 | cytochrome P450 [Catharanthus roseus]     |
| CL4153.Contig7  | XP_012851292.1 | 86.31 | 3.3E-252 | cytochrome P450 [Ocimum basilicum]        |
| CL4346.Contig10 | XP_012852863.1 | 55.37 | 1.4E-168 | cytochrome P450 [Theobroma cacao]         |
| CL4346.Contig4  | XP_012852863.1 | 56.9  | 6.6E-173 | cytochrome P450 [Theobroma cacao]         |
| CL4346.Contig7  | XP_012852863.1 | 55.93 | 2.1E-169 | cytochrome P450 [Theobroma cacao]         |
| CL4346.Contig8  | XP_012852863.1 | 56.31 | 8.3E-171 | cytochrome P450 [Theobroma cacao]         |
| CL4861.Contig1  | AOW42546.1     | 58.31 | 3.8E-90  | cytochrome P450 76AK8 [Salvia rosmarinus] |
| CL4861.Contig2  | AOW42546.1     | 62.2  | 2.5E-180 | cytochrome P450 76AK8 [Salvia rosmarinus] |
| CL5138.Contig1  | CDY56377.1     | 38.79 | 1.8E-12  | CYP71B25 [Arabidopsis thaliana]           |
| CL5583.Contig2  | XP_011101836.1 | 75.11 | 3.5E-207 | cytochrome P450 724B1 [Sesamum indicum]   |
| CL5609.Contig2  | CAA70575.1     | 72.3  | 5.9E-210 | cytochrome P450 [Nepeta racemosa]         |
| CL5609.Contig4  | CAA70575.1     | 70.08 | 2.8E-204 | cytochrome P450 [Nepeta racemosa]         |
| CL5609.Contig5  | CAA70575.1     | 70.39 | 5.7E-205 | cytochrome P450 [Nepeta racemosa]         |
| CL8195.Contig1  | XP_011098098.1 | 81.84 | 3.1E-192 | cytochrome P450 724B1 [Sesamum indicum]   |
| CL8195.Contig3  | XP_011098098.1 | 77.2  | 1.2E-216 | cytochrome P450 724B1 [Sesamum indicum]   |
| CL8195.Contig4  | XP_011098098.1 | 77.04 | 4.7E-213 | cytochrome P450 724B1 [Sesamum indicum]   |
| CL8310.Contig1  | EYU22015.1     | 43.77 | 6.9E-114 | cytochrome P450 [Salvia miltiorrhiza]     |
| CL8310.Contig2  | AOW42546.1     | 66.11 | 3.3E-196 | cytochrome P450 76AK8 [Salvia rosmarinus] |
| CL8745.Contig1  | XP_011082379.1 | 84.48 | 5E-263   | cytochrome P450 86A1 [Sesamum             |

---

|                 |                |       |          |                                                   |
|-----------------|----------------|-------|----------|---------------------------------------------------|
|                 |                |       |          | indicum]                                          |
| CL8745.Contig3  | XP_011082379.1 | 84.07 | 8.3E-261 | cytochrome P450 86A1 [Sesamum indicum]            |
| CL9036.Contig1  | AGN04219.1     | 81.97 | 3E-18    | cytochrome P450 [Salvia miltiorrhiza]             |
| Unigene10634    | CAD20576.2     | 87.4  | 5.6E-264 | cytochrome P450 98A2 [Sesamum indicum]            |
| Unigene13163    | KZV52647.1     | 73.79 | 5.7E-208 | CYP74A51 [Camellia sinensis]                      |
| Unigene26262    | XP_011094380.1 | 73.45 | 7.7E-217 | cytochrome P450 94A1 [Theobroma cacao]            |
| Unigene3030     | XP_011081026.1 | 58.75 | 9.7E-43  | cytochrome P450 [Corchorus olitorius]             |
| Unigene30346    | XP_012852140.1 | 84.74 | 2.2E-90  | cytochrome P450 704C1 [Sesamum indicum]           |
| Unigene31465    | NP_001291339.1 | 74.36 | 3E-231   | cytochrome P450 98A3 [Sesamum indicum]            |
| Unigene5513     | ALM25789.1     | 91.67 | 1.6E-89  | cytochrome P450 716A96 [Salvia pomifera]          |
| CL10076.Contig1 | KZV21240.1     | 64.59 | 3.8E-74  | cytochrome P450 CYP89A115 [Salvia miltiorrhiza]   |
| CL10107.Contig1 | XP_011092252.1 | 80.2  | 3.6E-241 | cytochrome P450 710A11 [Sesamum indicum]          |
| CL10107.Contig3 | XP_011085253.1 | 81.3  | 2.4E-243 | cytochrome P450 710A11 [Sesamum indicum]          |
| CL10107.Contig4 | XP_011092252.1 | 80.73 | 7E-243   | cytochrome P450 710A11 [Sesamum indicum]          |
| CL10163.Contig1 | AMZ03397.1     | 65.86 | 9.6E-175 | cytochrome P450 CYP71AT85 [Plectranthus barbatus] |
| CL10163.Contig3 | AJD25156.1     | 65.58 | 1.2E-174 | cytochrome P450 CYP71AT92 [Salvia miltiorrhiza]   |
| CL10601.Contig1 | AJD25196.1     | 77.83 | 8.8E-184 | cytochrome P450 CYP81Q40 [Salvia miltiorrhiza]    |
| CL10601.Contig2 | AJD25196.1     | 79.74 | 8.5E-211 | cytochrome P450 CYP81Q40 [Salvia miltiorrhiza]    |
| CL10743.Contig1 | AJD25170.1     | 72.29 | 6.7E-223 | cytochrome P450 CYP72A329 [Salvia miltiorrhiza]   |
| CL10743.Contig2 | NP_001291324.1 | 67.64 | 1.3E-207 | cytochrome P450 CYP72A328 [Salvia miltiorrhiza]   |
| CL10743.Contig3 | AJD25170.1     | 71.12 | 1.4E-217 | cytochrome P450 CYP72A329 [Salvia miltiorrhiza]   |

---

---

|                 |                |       |          |                                                   |
|-----------------|----------------|-------|----------|---------------------------------------------------|
| CL10743.Contig4 | AJD25170.1     | 74.22 | 2E-228   | cytochrome P450 CYP72A329 [Salvia miltiorrhiza]   |
| CL10743.Contig5 | NP_001291324.1 | 75.92 | 6.2E-155 | cytochrome P450 CYP72A328 [Salvia miltiorrhiza]   |
| CL10743.Contig6 | AJD25170.1     | 74.42 | 2.2E-229 | cytochrome P450 CYP72A329 [Salvia miltiorrhiza]   |
| CL10743.Contig7 | AJD25170.1     | 72.29 | 7.2E-223 | cytochrome P450 CYP72A329 [Salvia miltiorrhiza]   |
| CL10997.Contig1 | XP_011095827.1 | 64.52 | 1.1E-196 | cytochrome P450 CYP92B28 [Salvia miltiorrhiza]    |
| CL11238.Contig1 | AJD25202.1     | 72.93 | 2.7E-219 | cytochrome P450 CYP82U4 [Salvia miltiorrhiza]     |
| CL11238.Contig3 | AJD25202.1     | 76.04 | 1.4E-138 | cytochrome P450 CYP82U4 [Salvia miltiorrhiza]     |
| CL11238.Contig4 | AJD25202.1     | 72.85 | 1E-218   | cytochrome P450 CYP82U4 [Salvia miltiorrhiza]     |
| CL11719.Contig2 | XP_012838752.1 | 60.72 | 2.2E-176 | cytochrome P450 CYP76AH10 [Plectranthus barbatus] |
| CL11888.Contig1 | ALM25795.1     | 74.56 | 4.4E-64  | cytochrome P450 CYP76A35 [Salvia miltiorrhiza]    |
| CL11888.Contig2 | ALM25795.1     | 77.43 | 2.4E-97  | cytochrome P450 CYP76A35 [Salvia miltiorrhiza]    |
| CL11888.Contig3 | AJD25179.1     | 78.17 | 7.5E-229 | cytochrome P450 CYP76A35 [Salvia miltiorrhiza]    |
| CL12095.Contig1 | AJD25203.1     | 79.21 | 3.5E-243 | cytochrome P450 CYP82V2 [Salvia miltiorrhiza]     |
| CL1211.Contig1  | AMZ03398.1     | 66.45 | 1.8E-114 | cytochrome P450 CYP71AT87 [Plectranthus barbatus] |
| CL1211.Contig2  | AMZ03398.1     | 71.84 | 8.8E-114 | cytochrome P450 CYP71AT87 [Plectranthus barbatus] |
| CL1211.Contig3  | AMZ03398.1     | 70.92 | 9.5E-114 | cytochrome P450 CYP71AT87 [Plectranthus barbatus] |
| CL1211.Contig4  | AMZ03398.1     | 70.16 | 2.1E-197 | cytochrome P450 CYP71AT87 [Plectranthus barbatus] |
| CL1211.Contig5  | AMZ03398.1     | 67.56 | 4.8E-200 | cytochrome P450 CYP71AT87 [Plectranthus barbatus] |
| CL1211.Contig6  | AMZ03398.1     | 69.96 | 2.2E-196 | cytochrome P450 CYP71AT87 [Plectranthus barbatus] |

---



---

|                 |                |       |          |                            |                       |
|-----------------|----------------|-------|----------|----------------------------|-----------------------|
| CL12291.Contig2 | AJD25184.1     | 80.44 | 7E-122   | cytochrome P450 CYP76G16   | [Salvia miltiorrhiza] |
| CL12553.Contig1 | AJD25211.1     | 94.53 | 1.1E-257 | cytochrome P450 CYP90A39   | [Salvia miltiorrhiza] |
| CL12553.Contig2 | AJD25211.1     | 94.29 | 1.3E-255 | cytochrome P450 CYP90A39   | [Salvia miltiorrhiza] |
| CL12553.Contig3 | AJD25211.1     | 91.61 | 2.5E-165 | cytochrome P450 CYP90A39   | [Salvia miltiorrhiza] |
| CL12758.Contig1 | AJD25180.1     | 75    | 2.8E-221 | cytochrome P450 CYP76A36   | [Salvia miltiorrhiza] |
| CL12758.Contig2 | AJD25180.1     | 74.95 | 1.9E-219 | cytochrome P450 CYP76A36   | [Salvia miltiorrhiza] |
| CL1296.Contig2  | AJD25208.1     | 91.78 | 4.7E-284 | cytochrome P450 CYP86A92   | [Salvia miltiorrhiza] |
| CL13202.Contig1 | AJD25221.1     | 84.76 | 9.5E-243 | cytochrome P450 CYP94C54   | [Salvia miltiorrhiza] |
| CL13202.Contig2 | AJD25221.1     | 84.76 | 7.6E-243 | cytochrome P450 CYP94C54   | [Salvia miltiorrhiza] |
| CL13512.Contig3 | AJD25222.1     | 78.32 | 7E-215   | cytochrome P450 CYP94C55   | [Salvia miltiorrhiza] |
| CL13619.Contig1 | AJD25147.1     | 92.28 | 4E-267   | cytochrome P450 CYP51G1    | [Salvia miltiorrhiza] |
| CL13619.Contig2 | AJD25147.1     | 92.48 | 9.5E-268 | cytochrome P450 CYP51G1    | [Salvia miltiorrhiza] |
| CL13619.Contig3 | AJD25147.1     | 92.48 | 1E-267   | cytochrome P450 CYP51G1    | [Salvia miltiorrhiza] |
| CL13790.Contig1 | XP_012845193.1 | 75.8  | 6.4E-221 | cytochrome P450 CYP736A122 | [Salvia miltiorrhiza] |
| CL1384.Contig1  | AJD25192.1     | 75.77 | 1.7E-80  | cytochrome P450 CYP79D40   | [Salvia miltiorrhiza] |
| CL1384.Contig3  | AJD25192.1     | 73.63 | 2.8E-81  | cytochrome P450 CYP79D40   | [Salvia miltiorrhiza] |
| CL13862.Contig1 | AJD25214.1     | 86.68 | 7.8E-181 | cytochrome P450 CYP92A73   | [Salvia miltiorrhiza] |
| CL13862.Contig2 | AJD25214.1     | 92.19 | 6.4E-274 | cytochrome P450 CYP92A73   | [Salvia miltiorrhiza] |
| CL13862.Contig3 | AJD25214.1     | 93.36 | 5.5E-112 | cytochrome P450 CYP92A73   | [Salvia miltiorrhiza] |

---

---

|                 |            |       |          |                                                 |
|-----------------|------------|-------|----------|-------------------------------------------------|
| CL13862.Contig4 | AJD25214.1 | 92.23 | 6.3E-200 | cytochrome P450 CYP92A73 [Salvia miltiorrhiza]  |
| CL13862.Contig5 | AJD25214.1 | 92.02 | 1.4E-111 | cytochrome P450 CYP92A73 [Salvia miltiorrhiza]  |
| CL14346.Contig1 | AJD25155.1 | 72.34 | 2.5E-206 | cytochrome P450 CYP71AT91 [Salvia miltiorrhiza] |
| CL14346.Contig2 | AJD25155.1 | 71.17 | 2.7E-202 | cytochrome P450 CYP71AT91 [Salvia miltiorrhiza] |
| CL14346.Contig3 | AJD25155.1 | 68.21 | 9.6E-120 | cytochrome P450 CYP71AT91 [Salvia miltiorrhiza] |
| CL14346.Contig4 | AJD25155.1 | 75.68 | 1.4E-174 | cytochrome P450 CYP71AT91 [Salvia miltiorrhiza] |
| CL14759.Contig1 | AJD25220.1 | 83.76 | 4.2E-239 | cytochrome P450 CYP94B50 [Salvia miltiorrhiza]  |
| CL14759.Contig2 | AJD25220.1 | 83.76 | 3.1E-239 | cytochrome P450 CYP94B50 [Salvia miltiorrhiza]  |
| CL14945.Contig1 | AJD25227.1 | 89.48 | 3.6E-300 | cytochrome P450 CYP97B34 [Salvia miltiorrhiza]  |
| CL14945.Contig2 | AJD25227.1 | 82.04 | 5.5E-283 | cytochrome P450 CYP97B34 [Salvia miltiorrhiza]  |
| CL15079.Contig1 | AJD25247.1 | 79.42 | 2.1E-243 | cytochrome P450 CYP714G14 [Salvia miltiorrhiza] |
| CL15079.Contig2 | AJD25247.1 | 83.11 | 2.8E-254 | cytochrome P450 CYP714G14 [Salvia miltiorrhiza] |
| CL15079.Contig4 | AJD25247.1 | 74.91 | 6.8E-123 | cytochrome P450 CYP714G14 [Salvia miltiorrhiza] |
| CL15149.Contig1 | AHJ89438.1 | 80.33 | 8.8E-135 | cytochrome P450 CYP93B25 [Salvia miltiorrhiza]  |
| CL15149.Contig2 | BAB59004.1 | 83.53 | 1.6E-246 | cytochrome P450 CYP93B25 [Salvia miltiorrhiza]  |
| CL15149.Contig3 | BAB59004.1 | 84.33 | 4.2E-249 | cytochrome P450 CYP93B25 [Salvia miltiorrhiza]  |
| CL15249.Contig1 | ALM25790.1 | 76.57 | 3.9E-213 | cytochrome P450 CYP728D17 [Salvia miltiorrhiza] |
| CL15249.Contig2 | ALM25790.1 | 77.04 | 1.2E-214 | cytochrome P450 CYP728D17 [Salvia miltiorrhiza] |
| CL15547.Contig3 | BAB59005.1 | 81.45 | 8.7E-249 | cytochrome P450 CYP75B80 [Salvia miltiorrhiza]  |

---

---

|                 |                |       |          |                                                 |
|-----------------|----------------|-------|----------|-------------------------------------------------|
| CL16151.Contig1 | AJD25177.1     | 86.45 | 1.3E-246 | cytochrome P450 CYP75B79 [Salvia miltiorrhiza]  |
| CL16151.Contig2 | AJD25177.1     | 83.59 | 3.5E-250 | cytochrome P450 CYP75B79 [Salvia miltiorrhiza]  |
| CL16414.Contig1 | AJD25231.1     | 87.13 | 1.9E-261 | cytochrome P450 CYP98A77 [Salvia miltiorrhiza]  |
| CL16524.Contig1 | AJD25156.1     | 81.07 | 1.3E-110 | cytochrome P450 CYP71AT92 [Salvia miltiorrhiza] |
| CL16698.Contig1 | XP_012844328.1 | 78.01 | 6E-61    | cytochrome P450 CYP72A330 [Salvia miltiorrhiza] |
| CL16698.Contig2 | AJD25171.1     | 79.43 | 5.9E-63  | cytochrome P450 CYP72A330 [Salvia miltiorrhiza] |
| CL16700.Contig1 | AJD25237.1     | 85.14 | 5.7E-260 | cytochrome P450 CYP706C35 [Salvia miltiorrhiza] |
| CL16700.Contig2 | AJD25237.1     | 84.94 | 2E-259   | cytochrome P450 CYP706C35 [Salvia miltiorrhiza] |
| CL16700.Contig3 | AJD25237.1     | 84.94 | 3.6E-146 | cytochrome P450 CYP706C35 [Salvia miltiorrhiza] |
| CL16744.Contig1 | AJD25175.1     | 86.67 | 1.4E-62  | cytochrome P450 CYP74B21 [Salvia miltiorrhiza]  |
| CL16744.Contig2 | AJD25175.1     | 84.68 | 3.6E-238 | cytochrome P450 CYP74B21 [Salvia miltiorrhiza]  |
| CL1708.Contig1  | AJD25225.1     | 72.29 | 3E-218   | cytochrome P450 CYP96A85 [Salvia miltiorrhiza]  |
| CL1708.Contig2  | AJD25225.1     | 71.49 | 2E-214   | cytochrome P450 CYP96A85 [Salvia miltiorrhiza]  |
| CL1708.Contig3  | AJD25225.1     | 71.54 | 5.7E-214 | cytochrome P450 CYP96A85 [Salvia miltiorrhiza]  |
| CL17240.Contig2 | XP_011100951.1 | 66.25 | 4.5E-154 | cytochrome P450 CYP84A60 [Salvia miltiorrhiza]  |
| CL17371.Contig1 | AJD25171.1     | 81.43 | 1.1E-250 | cytochrome P450 CYP72A330 [Salvia miltiorrhiza] |
| CL17371.Contig2 | AJD25171.1     | 74.13 | 2.8E-226 | cytochrome P450 CYP72A330 [Salvia miltiorrhiza] |
| CL17371.Contig3 | AJD25171.1     | 81.1  | 4.2E-55  | cytochrome P450 CYP72A330 [Salvia miltiorrhiza] |
| CL17371.Contig5 | AJD25171.1     | 81.43 | 1.1E-250 | cytochrome P450 CYP72A330 [Salvia miltiorrhiza] |

---

---

|                  |                |       |          |                                                   |
|------------------|----------------|-------|----------|---------------------------------------------------|
| CL17371.Contig7  | AJD25171.1     | 80.8  | 5.7E-97  | cytochrome P450 CYP72A330 [Salvia miltiorrhiza]   |
| CL17371.Contig8  | AJD25171.1     | 82.63 | 2.7E-195 | cytochrome P450 CYP72A330 [Salvia miltiorrhiza]   |
| CL17371.Contig9  | AJD25171.1     | 82.77 | 9.7E-170 | cytochrome P450 CYP72A330 [Salvia miltiorrhiza]   |
| CL17586.Contig2  | ABC75596.1     | 94.03 | 1.5E-107 | cytochrome P450 CYP73A120 [Salvia miltiorrhiza]   |
| CL17745.Contig1  | XP_011082968.1 | 67.95 | 9.7E-212 | cytochrome P450 CYP72A326 [Salvia miltiorrhiza]   |
| CL17745.Contig10 | XP_011082968.1 | 73.79 | 9.8E-183 | cytochrome P450 CYP72A330 [Salvia miltiorrhiza]   |
| CL17745.Contig11 | XP_011082968.1 | 69.05 | 4.7E-217 | cytochrome P450 CYP72A326 [Salvia miltiorrhiza]   |
| CL17745.Contig2  | XP_011082968.1 | 68.02 | 6.8E-210 | cytochrome P450 CYP72A330 [Salvia miltiorrhiza]   |
| CL17745.Contig3  | XP_011082968.1 | 73.69 | 1.7E-227 | cytochrome P450 CYP72A330 [Salvia miltiorrhiza]   |
| CL17745.Contig4  | XP_011082968.1 | 69.77 | 2.2E-219 | cytochrome P450 CYP72A330 [Salvia miltiorrhiza]   |
| CL17745.Contig6  | XP_011082968.1 | 70.74 | 2.5E-220 | cytochrome P450 CYP72A330 [Salvia miltiorrhiza]   |
| CL17745.Contig7  | XP_011082968.1 | 70.6  | 4.9E-218 | cytochrome P450 CYP72A330 [Salvia miltiorrhiza]   |
| CL17745.Contig8  | XP_011082968.1 | 70.78 | 9.4E-214 | cytochrome P450 CYP72A330 [Salvia miltiorrhiza]   |
| CL17745.Contig9  | AJD25171.1     | 74.85 | 2.2E-232 | cytochrome P450 CYP72A330 [Salvia miltiorrhiza]   |
| CL17775.Contig1  | AMZ03386.1     | 71.17 | 3.1E-201 | cytochrome P450 CYP71D381 [Plectranthus barbatus] |
| CL1797.Contig2   | XP_011095827.1 | 71.37 | 8.3E-207 | cytochrome P450 CYP92B29 [Salvia miltiorrhiza]    |
| CL2184.Contig1   | AJD25205.1     | 83.17 | 9.3E-252 | cytochrome P450 CYP84A61 [Salvia miltiorrhiza]    |
| CL2184.Contig2   | AJD25205.1     | 83.82 | 5.5E-252 | cytochrome P450 CYP84A61 [Salvia miltiorrhiza]    |
| CL2184.Contig3   | AJD25205.1     | 83.24 | 3.1E-250 | cytochrome P450 CYP84A61 [Salvia miltiorrhiza]    |

---

---

|                |            |       |          |                                                   |
|----------------|------------|-------|----------|---------------------------------------------------|
| CL2184.Contig4 | AJD25204.1 | 88.22 | 4.9E-264 | cytochrome P450 CYP84A60 [Salvia miltiorrhiza]    |
| CL2184.Contig5 | AJD25204.1 | 88.42 | 1.1E-264 | cytochrome P450 CYP84A60 [Salvia miltiorrhiza]    |
| CL2184.Contig6 | AJD25205.1 | 83.01 | 5.5E-141 | cytochrome P450 CYP84A61 [Salvia miltiorrhiza]    |
| CL2184.Contig7 | AJD25204.1 | 83.95 | 2.1E-249 | cytochrome P450 CYP84A60 [Salvia miltiorrhiza]    |
| CL2184.Contig8 | AJD25205.1 | 83.2  | 7.1E-252 | cytochrome P450 CYP84A61 [Salvia miltiorrhiza]    |
| CL2340.Contig1 | AJD25245.1 | 78.39 | 6.9E-243 | cytochrome P450 CYP714E21 [Salvia miltiorrhiza]   |
| CL2795.Contig1 | AJD25249.1 | 84.97 | 4.1E-247 | cytochrome P450 CYP716C12 [Salvia miltiorrhiza]   |
| CL2795.Contig2 | AJD25249.1 | 86.34 | 2.6E-248 | cytochrome P450 CYP716C12 [Salvia miltiorrhiza]   |
| CL2795.Contig3 | AJD25249.1 | 91.84 | 7E-51    | cytochrome P450 CYP716C12 [Salvia miltiorrhiza]   |
| CL2957.Contig4 | AMZ03392.1 | 79.18 | 9.1E-227 | cytochrome P450 CYP76AH8 [Plectranthus barbatus]  |
| CL2957.Contig8 | AMZ03392.1 | 67.01 | 1.4E-187 | cytochrome P450 CYP76AH8 [Plectranthus barbatus]  |
| CL3067.Contig1 | AMZ03386.1 | 64.75 | 1.7E-98  | cytochrome P450 CYP71D381 [Plectranthus barbatus] |
| CL3249.Contig1 | AJD25261.1 | 74.36 | 1.8E-222 | cytochrome P450 CYP749A39 [Salvia miltiorrhiza]   |
| CL3249.Contig2 | AJD25261.1 | 70.33 | 4.3E-93  | cytochrome P450 CYP749A39 [Salvia miltiorrhiza]   |
| CL3249.Contig3 | AJD25261.1 | 70.74 | 7.1E-154 | cytochrome P450 CYP749A39 [Salvia miltiorrhiza]   |
| CL3249.Contig4 | AJD25261.1 | 74.63 | 4.2E-114 | cytochrome P450 CYP749A39 [Salvia miltiorrhiza]   |
| CL3249.Contig5 | AJD25261.1 | 72.8  | 5.4E-217 | cytochrome P450 CYP749A39 [Salvia miltiorrhiza]   |
| CL3249.Contig6 | AJD25261.1 | 69.67 | 8E-209   | cytochrome P450 CYP749A39 [Salvia miltiorrhiza]   |
| CL3359.Contig1 | AJD25199.1 | 77.02 | 3.7E-222 | cytochrome P450 CYP81Q43 [Salvia miltiorrhiza]    |

---

---

|                 |                |       |          |                                                  |
|-----------------|----------------|-------|----------|--------------------------------------------------|
| CL3359.Contig5  | AJD25199.1     | 77.42 | 6.9E-222 | cytochrome P450 CYP81Q43 [Salvia miltiorrhiza]   |
| CL3585.Contig2  | AJD25169.1     | 68.79 | 1.4E-58  | cytochrome P450 CYP72A328 [Salvia miltiorrhiza]  |
| CL3766.Contig2  | XP_011100884.1 | 72.87 | 6.5E-211 | cytochrome P450 CYP736A123 [Salvia miltiorrhiza] |
| CL3868.Contig10 | AJD25242.1     | 89.16 | 1E-166   | cytochrome P450 CYP707A102 [Salvia miltiorrhiza] |
| CL3868.Contig11 | AJD25242.1     | 80.65 | 2E-192   | cytochrome P450 CYP707A102 [Salvia miltiorrhiza] |
| CL3868.Contig12 | AJD25242.1     | 80.56 | 3E-192   | cytochrome P450 CYP707A102 [Salvia miltiorrhiza] |
| CL3868.Contig13 | AJD25242.1     | 87.82 | 1.3E-235 | cytochrome P450 CYP707A102 [Salvia miltiorrhiza] |
| CL3868.Contig14 | AJD25242.1     | 86.53 | 2E-215   | cytochrome P450 CYP707A102 [Salvia miltiorrhiza] |
| CL3868.Contig15 | AJD25242.1     | 84.85 | 6.1E-168 | cytochrome P450 CYP707A102 [Salvia miltiorrhiza] |
| CL3868.Contig17 | AJD25242.1     | 90.85 | 9.1E-84  | cytochrome P450 CYP707A102 [Salvia miltiorrhiza] |
| CL3868.Contig2  | AJD25242.1     | 87.77 | 2E-235   | cytochrome P450 CYP707A102 [Salvia miltiorrhiza] |
| CL3868.Contig3  | AJD25242.1     | 87.21 | 8.7E-217 | cytochrome P450 CYP707A102 [Salvia miltiorrhiza] |
| CL3868.Contig4  | AJD25242.1     | 86.65 | 9.9E-193 | cytochrome P450 CYP707A102 [Salvia miltiorrhiza] |
| CL3868.Contig5  | AJD25242.1     | 87.16 | 1.7E-216 | cytochrome P450 CYP707A102 [Salvia miltiorrhiza] |
| CL3868.Contig6  | AJD25242.1     | 87.16 | 1.7E-216 | cytochrome P450 CYP707A102 [Salvia miltiorrhiza] |
| CL3868.Contig9  | AJD25242.1     | 91.02 | 2.9E-211 | cytochrome P450 CYP707A102 [Salvia miltiorrhiza] |
| CL4153.Contig1  | AJD25248.1     | 88.73 | 7.2E-262 | cytochrome P450 CYP716A89 [Salvia miltiorrhiza]  |
| CL4153.Contig2  | AJD25248.1     | 91.04 | 3E-266   | cytochrome P450 CYP716A89 [Salvia miltiorrhiza]  |
| CL4153.Contig3  | AJD25248.1     | 87.82 | 1.7E-203 | cytochrome P450 CYP716A89 [Salvia miltiorrhiza]  |

---

---

|                |            |       |          |                                                      |
|----------------|------------|-------|----------|------------------------------------------------------|
| CL4153.Contig4 | AMZ03376.1 | 94    | 1.7E-52  | cytochrome P450 CYP716A68<br>[Plectranthus barbatus] |
| CL4153.Contig5 | AMZ03376.1 | 90    | 3.8E-50  | cytochrome P450 CYP716A68<br>[Plectranthus barbatus] |
| CL4683.Contig1 | AJD25174.1 | 80.17 | 7E-164   | cytochrome P450 CYP74A1 [Salvia<br>miltiorrhiza]     |
| CL4683.Contig2 | AJD25174.1 | 81.73 | 8.5E-252 | cytochrome P450 CYP74A1 [Salvia<br>miltiorrhiza]     |
| CL4683.Contig3 | AJD25174.1 | 81.92 | 1.5E-251 | cytochrome P450 CYP74A1 [Salvia<br>miltiorrhiza]     |
| CL4774.Contig1 | AJD25156.1 | 64.69 | 9.2E-193 | cytochrome P450 CYP71AT92 [Salvia<br>miltiorrhiza]   |
| CL4774.Contig2 | AMZ03397.1 | 67.8  | 1.3E-196 | cytochrome P450 CYP71AT85<br>[Plectranthus barbatus] |
| CL4774.Contig3 | AOA52647.1 | 67.13 | 1.5E-195 | cytochrome P450 CYP71AT92 [Salvia<br>miltiorrhiza]   |
| CL4774.Contig4 | AMZ03397.1 | 67.59 | 6.3E-187 | cytochrome P450 CYP71AT85<br>[Plectranthus barbatus] |
| CL542.Contig1  | AJD25168.1 | 67.06 | 1.1E-85  | cytochrome P450 CYP72A327 [Salvia<br>miltiorrhiza]   |
| CL542.Contig10 | AJD25168.1 | 65.06 | 3.9E-83  | cytochrome P450 CYP72A327 [Salvia<br>miltiorrhiza]   |
| CL542.Contig2  | AJD25168.1 | 70.82 | 6E-134   | cytochrome P450 CYP72A327 [Salvia<br>miltiorrhiza]   |
| CL542.Contig3  | AJD25168.1 | 72.58 | 2.3E-102 | cytochrome P450 CYP72A327 [Salvia<br>miltiorrhiza]   |
| CL542.Contig4  | AJD25168.1 | 76.36 | 1.2E-111 | cytochrome P450 CYP72A327 [Salvia<br>miltiorrhiza]   |
| CL542.Contig5  | AJD25168.1 | 75.98 | 2E-228   | cytochrome P450 CYP72A327 [Salvia<br>miltiorrhiza]   |
| CL542.Contig6  | AJD25168.1 | 73.6  | 4.6E-228 | cytochrome P450 CYP72A327 [Salvia<br>miltiorrhiza]   |
| CL542.Contig7  | AMZ03389.1 | 80.14 | 8.8E-61  | cytochrome P450 CYP72A294<br>[Plectranthus barbatus] |
| CL542.Contig9  | AJD25168.1 | 77.13 | 2.6E-79  | cytochrome P450 CYP72A327 [Salvia<br>miltiorrhiza]   |
| CL548.Contig2  | AJD25163.1 | 63.56 | 7.3E-182 | cytochrome P450 CYP71D410 [Salvia<br>miltiorrhiza]   |

---

---

|                |                |       |          |                                                    |
|----------------|----------------|-------|----------|----------------------------------------------------|
| CL548.Contig3  | AJD25163.1     | 58.36 | 3E-85    | cytochrome P450 CYP71D410 [Salvia miltiorrhiza]    |
| CL548.Contig4  | AMZ03386.1     | 53.6  | 5.8E-27  | cytochrome P450 CYP71D381 [Plectranthus barbatus]  |
| CL548.Contig5  | AJD25163.1     | 62.65 | 3.6E-177 | cytochrome P450 CYP71D410 [Salvia miltiorrhiza]    |
| CL5600.Contig1 | XP_011078642.1 | 78.71 | 4.3E-231 | cytochrome P450 CYP736A121 [Salvia miltiorrhiza]   |
| CL5600.Contig2 | AJD25256.1     | 78.99 | 5.7E-233 | cytochrome P450 CYP736A121 [Salvia miltiorrhiza]   |
| CL5600.Contig3 | AJD25256.1     | 75.4  | 8.7E-224 | cytochrome P450 CYP736A121 [Salvia miltiorrhiza]   |
| CL5609.Contig3 | O04164.1       | 69.13 | 2.2E-202 | cytochrome P450 CYP71A57 [Salvia miltiorrhiza]     |
| CL6335.Contig1 | AJD25156.1     | 75.05 | 1.3E-218 | cytochrome P450 CYP71AT92 [Salvia miltiorrhiza]    |
| CL6481.Contig2 | AMZ03395.1     | 73.28 | 1.1E-222 | cytochrome P450 CYP82D63 [Plectranthus barbatus]   |
| CL6672.Contig1 | XP_012853764.1 | 79.47 | 8.5E-84  | cytochrome P450 CYP81Q43 [Salvia miltiorrhiza]     |
| CL6909.Contig1 | XP_019163354.1 | 70.67 | 1.7E-227 | cytochrome P450 [Cynara cardunculus var. scolymus] |
| CL6909.Contig2 | XP_020546889.1 | 72.5  | 2.4E-229 | cytochrome P450 [Cynara cardunculus var. scolymus] |
| CL699.Contig3  | AJD25218.1     | 72.08 | 8.5E-210 | cytochrome P450 CYP94A48 [Salvia miltiorrhiza]     |
| CL699.Contig6  | AJD25218.1     | 83.26 | 5.9E-231 | cytochrome P450 CYP94A48 [Salvia miltiorrhiza]     |
| CL699.Contig7  | AJD25218.1     | 82.63 | 2.1E-228 | cytochrome P450 CYP94A48 [Salvia miltiorrhiza]     |
| CL699.Contig8  | AJD25218.1     | 80.31 | 6.8E-236 | cytochrome P450 CYP94A48 [Salvia miltiorrhiza]     |
| CL699.Contig9  | AJD25218.1     | 79.92 | 1E-234   | cytochrome P450 CYP94A48 [Salvia miltiorrhiza]     |
| CL7255.Contig1 | EYU32284.1     | 84.51 | 2E-138   | cytochrome P450 CYP78A115 [Salvia miltiorrhiza]    |
| CL7255.Contig2 | EYU32284.1     | 73.08 | 4.2E-219 | cytochrome P450 CYP78A115 [Salvia miltiorrhiza]    |

---



---

|                |                |       |          |                                                          |
|----------------|----------------|-------|----------|----------------------------------------------------------|
| CL7255.Contig3 | EYU32284.1     | 73.27 | 2.7E-219 | cytochrome P450 CYP78A115 [Salvia miltiorrhiza]          |
| CL7373.Contig2 | AJD25228.1     | 89.34 | 1.1E-279 | cytochrome P450 CYP97C28 [Salvia miltiorrhiza]           |
| CL7416.Contig1 | AJD25229.1     | 90.06 | 2E-187   | cytochrome P450 CYP98A75 [Salvia miltiorrhiza]           |
| CL7416.Contig2 | AJD25229.1     | 92.29 | 2.5E-280 | cytochrome P450 CYP98A75 [Salvia miltiorrhiza]           |
| CL7416.Contig3 | AJD25229.1     | 87.4  | 4E-188   | cytochrome P450 CYP98A75 [Salvia miltiorrhiza]           |
| CL7416.Contig6 | AJD25229.1     | 91.93 | 5.6E-188 | cytochrome P450 CYP98A75 [Salvia miltiorrhiza]           |
| CL7416.Contig7 | AJD25229.1     | 92.14 | 9.8E-282 | cytochrome P450 CYP98A75 [Salvia miltiorrhiza]           |
| CL7416.Contig8 | AJD25229.1     | 91.55 | 7.1E-280 | cytochrome P450 CYP98A75 [Salvia miltiorrhiza]           |
| CL7517.Contig1 | AJD25193.1     | 76.24 | 2.1E-225 | cytochrome P450 CYP81B61 [Salvia miltiorrhiza]           |
| CL7517.Contig2 | AJD25193.1     | 76.13 | 3.3E-225 | cytochrome P450 CYP81B61 [Salvia miltiorrhiza]           |
| CL7517.Contig3 | AJD25193.1     | 76.57 | 2.5E-128 | cytochrome P450 CYP81B61 [Salvia miltiorrhiza]           |
| CL7517.Contig4 | AJD25193.1     | 75.74 | 3.1E-127 | cytochrome P450 CYP81B61 [Salvia miltiorrhiza]           |
| CL7706.Contig2 | XP_013723179.1 | 26.76 | 2E-09    | cytochrome P450 CYP83A1 [Brassica oleracea var. italica] |
| CL843.Contig1  | AJD25210.1     | 82.31 | 8.2E-242 | cytochrome P450 CYP89A115 [Salvia miltiorrhiza]          |
| CL843.Contig2  | AJD25210.1     | 83.23 | 1.8E-244 | cytochrome P450 CYP89A115 [Salvia miltiorrhiza]          |
| CL843.Contig4  | AJD25210.1     | 81.7  | 1.4E-174 | cytochrome P450 CYP89A115 [Salvia miltiorrhiza]          |
| CL843.Contig5  | AJD25210.1     | 82.3  | 4.2E-234 | cytochrome P450 CYP89A115 [Salvia miltiorrhiza]          |
| CL8878.Contig1 | AJD25187.1     | 90.62 | 1.8E-271 | cytochrome P450 CYP77A27 [Salvia miltiorrhiza]           |
| CL9408.Contig1 | AJD25198.1     | 80.96 | 8.8E-236 | cytochrome P450 CYP81Q42 [Salvia miltiorrhiza]           |

---

---

|                |                |       |          |                                                    |
|----------------|----------------|-------|----------|----------------------------------------------------|
| CL9408.Contig2 | AJD25198.1     | 80.96 | 9E-236   | cytochrome P450 CYP81Q42 [Salvia miltiorrhiza]     |
| CL9914.Contig2 | AJD25185.1     | 76.16 | 8.3E-215 | cytochrome P450 CYP76S7 [Salvia miltiorrhiza]      |
| CL9914.Contig5 | AJD25185.1     | 75.35 | 3.4E-216 | cytochrome P450 CYP76S7 [Salvia miltiorrhiza]      |
| CL9950.Contig2 | ABC75596.1     | 95.45 | 6.7E-284 | cytochrome P450 CYP73A120 [Salvia miltiorrhiza]    |
| Unigene10759   | AJD25169.1     | 77.34 | 6.2E-190 | cytochrome P450 CYP72A328 [Salvia miltiorrhiza]    |
| Unigene11470   | AJD25169.1     | 64.67 | 2.1E-129 | cytochrome P450 CYP72A328 [Salvia miltiorrhiza]    |
| Unigene11591   | XP_011082223.1 | 80.6  | 8.5E-250 | cytochrome P450 711A1 isoform X2 [Sesamum indicum] |
| Unigene11871   | AJD25221.1     | 82.35 | 9.6E-58  | cytochrome P450 CYP94C54 [Salvia miltiorrhiza]     |
| Unigene12093   | AJD25226.1     | 93.65 | 0        | cytochrome P450 CYP97A41 [Salvia miltiorrhiza]     |
| Unigene12109   | AJD25235.1     | 82.02 | 6.4E-241 | cytochrome P450 CYP704A99 [Salvia miltiorrhiza]    |
| Unigene12411   | AJD25189.1     | 78.04 | 3.4E-147 | cytochrome P450 CYP78A113 [Salvia miltiorrhiza]    |
| Unigene13158   | AMZ03392.1     | 76.02 | 2.5E-107 | cytochrome P450 CYP76AH8 [Plectranthus barbatus]   |
| Unigene23370   | AJD25215.1     | 73.36 | 4.3E-216 | cytochrome P450 CYP92B28 [Salvia miltiorrhiza]     |
| Unigene2359    | AMZ03391.1     | 86.17 | 3.8E-252 | cytochrome P450 CYP76AH9 [Plectranthus barbatus]   |
| Unigene23619   | XP_011082968.1 | 73.01 | 1.4E-225 | cytochrome P450 CYP72A330 [Salvia miltiorrhiza]    |
| Unigene24431   | XP_011070908.1 | 75    | 3.7E-226 | cytochrome P450 CYP749A22 [Sesamum indicum]        |
| Unigene28242   | XP_011089169.1 | 78.54 | 3.6E-110 | cytochrome P450 CYP716D20 [Plectranthus barbatus]  |
| Unigene2848    | AMZ03402.1     | 67.17 | 1.1E-125 | cytochrome P450 CYP76AH15 [Plectranthus barbatus]  |
| Unigene299     | AJD25159.1     | 79.04 | 2.6E-232 | cytochrome P450 CYP71AU52 [Salvia miltiorrhiza]    |

---

---

|              |                |       |          |                                                   |
|--------------|----------------|-------|----------|---------------------------------------------------|
| Unigene29940 | XP_011085047.1 | 72.97 | 6.5E-37  | cytochrome P450 CYP71AU51 [Salvia miltiorrhiza]   |
| Unigene301   | ALR74628.1     | 84.39 | 3.7E-259 | cytochrome P450 CYP701A40 [Salvia miltiorrhiza]   |
| Unigene31829 | ALM25793.1     | 67.89 | 1.3E-94  | cytochrome P450 CYP71AU53 [Salvia miltiorrhiza]   |
| Unigene3203  | AJD25219.1     | 79.17 | 6.5E-229 | cytochrome P450 CYP94A49 [Salvia miltiorrhiza]    |
| Unigene3291  | AJD25190.1     | 79.4  | 1E-235   | cytochrome P450 CYP78A114 [Salvia miltiorrhiza]   |
| Unigene34382 | XP_012850388.1 | 56.52 | 1.1E-61  | cytochrome P450 CYP716A89 [Salvia miltiorrhiza]   |
| Unigene34383 | AHA50080.1     | 61.75 | 2.4E-76  | cytochrome P450 [Eleutherococcus senticosus]      |
| Unigene36145 | AJD25156.1     | 77.14 | 3.6E-40  | cytochrome P450 CYP71AT92 [Salvia miltiorrhiza]   |
| Unigene36533 | XP_001690122.1 | 24.23 | 2.5E-16  | cytochrome P450 [Chlamydomonas reinhardtii]       |
| Unigene38087 | AJD25199.1     | 75.37 | 1.4E-86  | cytochrome P450 CYP81Q43 [Salvia miltiorrhiza]    |
| Unigene52691 | AJD25218.1     | 83.02 | 1.1E-45  | cytochrome P450 CYP94A48 [Salvia miltiorrhiza]    |
| Unigene52945 | ALR74628.1     | 76.18 | 2.3E-155 | cytochrome P450 CYP701A40 [Salvia miltiorrhiza]   |
| Unigene54571 | XP_011087220.1 | 71.76 | 1.6E-213 | cytochrome P450 CYP94A48 [Salvia miltiorrhiza]    |
| Unigene56325 | XP_011100232.1 | 75.37 | 1.7E-145 | cytochrome P450 CYP76A36 [Salvia miltiorrhiza]    |
| Unigene57565 | AJD25168.1     | 82.16 | 8.3E-189 | cytochrome P450 CYP72A327 [Salvia miltiorrhiza]   |
| Unigene57566 | AJD25168.1     | 81.89 | 1.2E-108 | cytochrome P450 CYP72A327 [Salvia miltiorrhiza]   |
| Unigene57706 | XP_011082968.1 | 75.93 | 2.7E-117 | cytochrome P450 CYP72A294 [Plectranthus barbatus] |
| Unigene58003 | AMZ03392.1     | 86.7  | 2E-116   | cytochrome P450 CYP76AH8 [Plectranthus barbatus]  |
| Unigene5881  | XP_011101640.1 | 77.2  | 6.9E-236 | cytochrome P450 CYP77A27 [Salvia miltiorrhiza]    |

---

---

|              |                |       |          |                                                  |
|--------------|----------------|-------|----------|--------------------------------------------------|
| Unigene61608 | AJD25192.1     | 72.39 | 1.2E-219 | cytochrome P450 CYP79D40 [Salvia miltiorrhiza]   |
| Unigene6317  | AJD25240.1     | 83.26 | 2.2E-212 | cytochrome P450 CYP707A100 [Salvia miltiorrhiza] |
| Unigene6321  | AJD25167.1     | 72.83 | 5E-221   | cytochrome P450 CYP72A326 [Salvia miltiorrhiza]  |
| Unigene6536  | AJD25197.1     | 78.09 | 1E-220   | cytochrome P450 CYP81Q41 [Salvia miltiorrhiza]   |
| Unigene6689  | XP_011099350.1 | 70.25 | 7.4E-197 | cytochrome P450 CYP81Q43 [Salvia miltiorrhiza]   |
| Unigene7148  | AJD25175.1     | 83.71 | 4E-165   | cytochrome P450 CYP74B21 [Salvia miltiorrhiza]   |
| Unigene7220  | Q42716.1       | 82.34 | 5.5E-230 | cytochrome P450 CYP71A58 [Salvia miltiorrhiza]   |
| Unigene8586  | AJD25260.1     | 84.78 | 1.3E-255 | cytochrome P450 CYP749A38 [Salvia miltiorrhiza]  |
| Unigene8669  | AJD25207.1     | 91.56 | 8.6E-297 | cytochrome P450 CYP86A91 [Salvia miltiorrhiza]   |
| Unigene89    | AJD25234.1     | 81.64 | 4.5E-249 | cytochrome P450 CYP704A98 [Salvia miltiorrhiza]  |
| Unigene90    | AJD25234.1     | 81.64 | 3.1E-249 | cytochrome P450 CYP704A98 [Salvia miltiorrhiza]  |
| Unigene9229  | AJD25251.1     | 83.98 | 3.3E-238 | cytochrome P450 CYP720A1 [Salvia miltiorrhiza]   |
| Unigene9597  | AJD25169.1     | 68.28 | 2.1E-84  | cytochrome P450 CYP72A328 [Salvia miltiorrhiza]  |

---

**Supplementary Table S3** Glucosyltransferases annotated in *C. chinense*.

| Query_id        | Subject_id     | Identity | E_value  | Subject_annotation                                                        |
|-----------------|----------------|----------|----------|---------------------------------------------------------------------------|
| CL13036.Contig2 | XP_012858542.1 | 72.38    | 8.9E-209 | glycosyltransferase [ <i>Lycium barbarum</i> ]                            |
| CL13535.Contig1 | XP_011099399.1 | 80.56    | 7.6E-127 | glycosyltransferase 6 [ <i>Sesamum indicum</i> ]                          |
| CL8216.Contig4  | XP_020535976.1 | 56.45    | 1.2E-06  | glycosyl transferase [ <i>Macleaya cordata</i> ]                          |
| Unigene12918    | BAG31948.1     | 76.38    | 3.7E-201 | UGT88D7 [ <i>Perilla frutescens</i> ]                                     |
| Unigene12917    | BAG31948.1     | 75.82    | 1.3E-201 | UGT88D7 [ <i>Perilla frutescens</i> ]                                     |
| Unigene31451    | XP_012858542.1 | 77.51    | 2.6E-72  | glycosyltransferase [ <i>Lycium barbarum</i> ]                            |
| Unigene801      | XP_012845190.1 | 67.92    | 3E-184   | UDP-rhamnose:rhamnosyltransferase 1<br>[ <i>Doroceras hygrometricum</i> ] |
| Unigene7805     | XP_012839050.1 | 54.39    | 2.3E-134 | UDP-glycosyltransferase 74E2 [ <i>Morus notabilis</i> ]                   |
| Unigene6530     | XP_012843823.1 | 67.8     | 2E-190   | UDP-sugar:glycosyltransferase [ <i>Forsythia x intermedia</i> ]           |
| Unigene58585    | XP_011098502.1 | 58.75    | 3.9E-75  | UDP-glycosyltransferase 90A1 [ <i>Sesamum indicum</i> ]                   |
| Unigene54111    | XP_011088227.1 | 59.07    | 1.5E-157 | UDP glucosyltransferase [ <i>Scutellaria barbata</i> ]                    |
| Unigene53347    | XP_011087901.1 | 79.94    | 3E-155   | UDP-glucuronosyl/UDP-glycosyltransferase<br>[ <i>Macleaya cordata</i> ]   |
| Unigene33854    | XP_011084237.1 | 71.69    | 1E-110   | UDP-glycosyltransferase 91C1 [ <i>Sesamum indicum</i> ]                   |
| Unigene32667    | XP_011077327.1 | 77.01    | 4.6E-73  | UDP-glycosyltransferase 86A1 [ <i>Sesamum indicum</i> ]                   |
| Unigene3258     | XP_012831918.1 | 74.7     | 9.5E-137 | Glycosyl transferase [ <i>Doroceras hygrometricum</i> ]                   |
| Unigene319      | XP_011082325.1 | 63.58    | 3.9E-180 | UDP-glycosyltransferase 85A28 [ <i>Vitis vinifera</i> ]                   |
| Unigene3061     | XP_011098740.1 | 63.47    | 2.3E-168 | UDP-glycosyltransferase 83A1 [ <i>Sesamum indicum</i> ]                   |
| Unigene30402    | XP_011098517.1 | 83.41    | 0        | xyloglucan glycosyltransferase 4 [ <i>Sesamum indicum</i> ]               |
| Unigene28067    | XP_011100452.1 | 60.04    | 2.1E-156 | UDP-glycosyltransferase 71E1 [ <i>Sesamum indicum</i> ]                   |
| Unigene24073    | XP_012894366.1 | 30.43    | 1.5E-18  | glycosyl transferase [ <i>Blastocystis sp. subtype 4</i> ]                |
| Unigene22910    | XP_011076757.1 | 64.62    | 6.4E-176 | udp-glycosyltransferase 85a7 [ <i>Nicotiana attenuata</i> ]               |

---

|                |                |       |          |                                                                             |
|----------------|----------------|-------|----------|-----------------------------------------------------------------------------|
| Unigene22140   | XP_011101335.1 | 87.01 | 4.1E-228 | UDP-glucuronosyl/UDP-glucosyltransferase [Corchorus olitorius]              |
| Unigene19903   | XP_011098502.1 | 60.55 | 4.4E-90  | UDP-glycosyltransferase 90A1 [Sesamum indicum]                              |
| Unigene11429   | KZV42770.1     | 57.05 | 1.7E-92  | UDP-glycosyltransferase 83A1 [Morus notabilis]                              |
| Unigene11150   | XP_011089226.1 | 66.36 | 1.1E-36  | UDP-glycosyltransferase 87A1-like [Sesamum indicum]                         |
| Unigene10594   | Q9ZR27.1       | 77.07 | 6.2E-204 | UDP-glucose:glucosyltransferase [Lycium barbarum]                           |
| Unigene10175   | XP_011100441.1 | 71.62 | 1.3E-183 | UDP-glycosyltransferase 82A1 [Sesamum indicum]                              |
| CL9711.Contig1 | XP_019055273.1 | 49.88 | 1.2E-108 | UDP-glycosyltransferase 23 [Pueraria montana var. lobata]                   |
| CL9658.Contig1 | XP_011094738.1 | 66.94 | 6.5E-93  | UDP-glycosyltransferase 86A1-like [Sesamum indicum]                         |
| CL8978.Contig2 | XP_011094571.1 | 67.69 | 2.5E-193 | UDP-glycosyltransferase 73C5 [Sesamum indicum]                              |
| CL8978.Contig1 | XP_011094571.1 | 66.05 | 1.7E-190 | UDP-glycosyltransferase 73C5 [Sesamum indicum]                              |
| CL8850.Contig3 | XP_020548990.1 | 73.2  | 4.1E-106 | UDP-glycosyltransferase 88B1-like [Sesamum indicum]                         |
| CL8850.Contig2 | XP_020548989.1 | 72.14 | 3.7E-117 | UDP-glycosyltransferase 88B1-like [Sesamum indicum]                         |
| CL7672.Contig5 | XP_011088204.1 | 70.93 | 1.5E-203 | UDP-glycosyltransferase 84A22 [Camellia sinensis]                           |
| CL7672.Contig4 | XP_011088204.1 | 70.93 | 1.9E-203 | UDP-glycosyltransferase 84A22 [Camellia sinensis]                           |
| CL7672.Contig3 | XP_011088204.1 | 72.73 | 1.2E-206 | UDP-glycosyltransferase 84A22 [Camellia sinensis]                           |
| CL7672.Contig1 | XP_011088204.1 | 71.91 | 5.1E-204 | UDP-glycosyltransferase 84A22 [Camellia sinensis]                           |
| CL753.Contig2  | XP_011075343.2 | 54.73 | 3.6E-57  | UDP-glucuronosyl/UDP-glucosyltransferase [Cynara cardunculus var. scolymus] |
| CL7267.Contig4 | XP_011082054.1 | 71.09 | 4.5E-191 | UDP-glycosyltransferase 74E2-like [Sesamum indicum]                         |
| CL7267.Contig3 | XP_011082054.1 | 67.84 | 3.1E-187 | UDP-glycosyltransferase 74E2-like [Sesamum indicum]                         |

---

---

|                |                |       |          |                                                         |
|----------------|----------------|-------|----------|---------------------------------------------------------|
| CL7267.Contig1 | XP_011082054.1 | 71.02 | 2.8E-188 | UDP-glycosyltransferase 74E2-like<br>[Sesamum indicum]  |
| CL6566.Contig2 | XP_011093112.2 | 54.94 | 4.7E-144 | UDP-glycosyltransferase 91C1 [Sesamum<br>indicum]       |
| CL6566.Contig1 | XP_011093112.2 | 56.09 | 7.8E-145 | UDP-glycosyltransferase 91C1 [Sesamum<br>indicum]       |
| CL5761.Contig4 | XP_011094737.1 | 66.74 | 6.7E-183 | UDP-glycosyltransferase 86A1-like<br>[Sesamum indicum]  |
| CL5446.Contig2 | XP_011094568.1 | 76.34 | 2.3E-214 | UDP-glycosyltransferase 73D1 [Sesamum<br>indicum]       |
| CL5446.Contig1 | XP_011094568.1 | 75.51 | 6.4E-214 | UDP-glycosyltransferase 73D1 [Sesamum<br>indicum]       |
| CL5412.Contig3 | XP_011076757.1 | 69.42 | 3.2E-196 | UDP-glycosyltransferase 85a7 [Nicotiana<br>attenuata]   |
| CL5412.Contig2 | XP_011076757.1 | 72.52 | 6.1E-207 | UDP -glycosyltransferase 85a7 [Nicotiana<br>attenuata]  |
| CL4477.Contig1 | XP_011084237.1 | 71.46 | 5.1E-198 | UDP-glycosyltransferase 91C1 [Sesamum<br>indicum]       |
| CL3150.Contig4 | XP_012858058.1 | 63.22 | 5.7E-144 | UDP-glycosyltransferase BMGT2 [Bacopa<br>monnieri]      |
| CL3150.Contig2 | XP_012858058.1 | 59.71 | 1.2E-110 | UDP-glycosyltransferase BMGT2 [Bacopa<br>monnieri]      |
| CL3150.Contig1 | XP_012858058.1 | 66.18 | 1.3E-150 | UDP-glycosyltransferase BMGT2 [Bacopa<br>monnieri]      |
| CL2908.Contig5 | XP_012855183.1 | 59.15 | 6E-42    | UDP -glycosyltransferase 708c1 [Nicotiana<br>attenuata] |
| CL1905.Contig6 | XP_011092852.1 | 68.09 | 6.1E-186 | UDP-glycosyltransferase 91C1 [Sesamum<br>indicum]       |
| CL1905.Contig5 | XP_011092852.1 | 68.3  | 8.1E-188 | UDP-glycosyltransferase 91C1 [Sesamum<br>indicum]       |
| CL1905.Contig4 | XP_011092852.1 | 72.9  | 3.5E-88  | UDP-glycosyltransferase 91C1 [Sesamum<br>indicum]       |
| CL1905.Contig3 | XP_011092852.1 | 69.68 | 2.2E-196 | UDP-glycosyltransferase 91C1 [Sesamum<br>indicum]       |
| CL1905.Contig2 | XP_011092852.1 | 69.39 | 3.6E-140 | UDP-glycosyltransferase 91C1 [Sesamum<br>indicum]       |
| CL1905.Contig1 | XP_011092852.1 | 67.2  | 3E-92    | UDP-glycosyltransferase 91C1 [Sesamum<br>indicum]       |

---

---

|                 |                |       |          |                                                                |
|-----------------|----------------|-------|----------|----------------------------------------------------------------|
| CL17415.Contig1 | XP_011089086.1 | 77.97 | 2.6E-209 | UDP-glycosyltransferase 87A1-like<br>[Sesamum indicum]         |
| CL16513.Contig2 | XP_011098517.1 | 87.35 | 0        | xyloglucan glycosyltransferase 4 [Sesamum<br>indicum]          |
| CL16513.Contig1 | XP_011085811.1 | 86.51 | 0        | xyloglucan glycosyltransferase 4 [Sesamum<br>indicum]          |
| CL16251.Contig2 | XP_011084980.1 | 70.87 | 6.7E-195 | UDP-glycosyltransferase 76F1 [Jatropha<br>curcas]              |
| CL15953.Contig2 | XP_011077373.2 | 66.37 | 9.5E-121 | glycosyl transferase [Dorcoceras<br>hygrometricum]             |
| CL15953.Contig1 | XP_011077373.2 | 66.67 | 3.7E-120 | glycosyl transferase [Dorcoceras<br>hygrometricum]             |
| CL15287.Contig2 | XP_012829432.1 | 68.13 | 2.2E-145 | UDP-glucuronosyl/UDP-glycosyltransferase<br>[Macleaya cordata] |
| CL13535.Contig3 | XP_011099399.1 | 77.49 | 7.6E-222 | UDP-glucuronosyl/UDP-glycosyltransferase<br>[Macleaya cordata] |
| CL13502.Contig1 | AJM89728.1     | 71.24 | 7E-189   | UDP-glycosyltransferase [Leonurus<br>japonicus]                |
| CL12824.Contig1 | XP_012836028.1 | 70.45 | 4.6E-199 | UDP-glycosyltransferase 86A1 [Sesamum<br>indicum]              |
| CL11215.Contig3 | XP_011086492.1 | 74.91 | 2.8E-239 | UDP-glycosyltransferase 74B1 [Sesamum<br>indicum]              |
| CL11215.Contig2 | XP_011086492.1 | 74.74 | 1.1E-238 | UDP-glycosyltransferase 74B1 [Sesamum<br>indicum]              |
| CL10742.Contig1 | BAI65913.1     | 53.51 | 3E-134   | UDP-sugar:glycosyltransferase [Forsythia x<br>intermedia]      |
| CL10593.Contig9 | XP_011073993.1 | 58.3  | 1.7E-144 | UDP-glycosyltransferase 74E2-like<br>[Sesamum indicum]         |
| CL10593.Contig7 | XP_012839050.1 | 55.63 | 9.1E-133 | UDP-glycosyltransferase BMGT1 [Bacopa<br>monnieri]             |
| CL10593.Contig6 | XP_011073993.1 | 61.71 | 2.5E-153 | UDP-glycosyltransferase 74E2-like<br>[Sesamum indicum]         |
| CL10593.Contig5 | XP_011073993.1 | 55.18 | 3E-133   | UDP-glycosyltransferase 74E2-like<br>[Sesamum indicum]         |
| CL10593.Contig4 | XP_011073993.1 | 54.55 | 1.3E-108 | UDP-glycosyltransferase 74E2-like<br>[Sesamum indicum]         |
| CL10593.Contig3 | XP_011073993.1 | 61.27 | 3.3E-152 | UDP-glycosyltransferase 74E2-like<br>[Sesamum indicum]         |

---



---

|                  |                |       |          |                                                                    |
|------------------|----------------|-------|----------|--------------------------------------------------------------------|
| CL10593.Contig2  | XP_011073993.1 | 59.24 | 5.4E-144 | UDP-glycosyltransferase 74E2-like<br>[Sesamum indicum]             |
| CL10593.Contig11 | XP_012839050.1 | 54.75 | 3.9E-131 | UDP-glycosyltransferase BMGT1 [Bacopa<br>monnieri]                 |
| CL10593.Contig10 | XP_011073993.1 | 63.89 | 3.1E-70  | UDP-glycosyltransferase 74E2-like<br>[Sesamum indicum]             |
| CL10046.Contig2  | XP_011070892.1 | 67.86 | 3.4E-186 | UDP-glycosyltransferase 89A2 [Sesamum<br>indicum]                  |
| CL10046.Contig1  | XP_011070892.1 | 65.62 | 5.4E-153 | UDP-glycosyltransferase 89A2 [Sesamum<br>indicum]                  |
| CL10006.Contig4  | XP_011078914.1 | 48.1  | 2.2E-08  | UDP-glucuronosyl/UDP-glycosyltransferase<br>[Corchorus capsularis] |

---

**Supplementary Table S4** Beta amyrin synthase annotated in *C. chinense*.

| Query id        | Subject id     | Identity | E value  | Subject annotation                                  |
|-----------------|----------------|----------|----------|-----------------------------------------------------|
| CL17709.Contig1 | XP_011093795.1 | 83.38    | 0.00E+00 | beta-amyrin synthase<br>[Sesamum indicum]           |
| CL2196.Contig2  | KZV14753.1     | 87.05    | 0.00E+00 | beta-amyrin synthase<br>[Dorcocheras hygrometricum] |
| CL2196.Contig4  | KZV14753.1     | 86.26    | 0.00E+00 | beta-amyrin synthase<br>[Dorcocheras hygrometricum] |
| CL2196.Contig5  | KZV14753.1     | 86.26    | 0.00E+00 | beta-amyrin synthase<br>[Dorcocheras hygrometricum] |
| CL2196.Contig8  | KZV14753.1     | 86.39    | 0.00E+00 | beta-amyrin synthase<br>[Dorcocheras hygrometricum] |
| CL5601.Contig1  | KZV51042.1     | 83.01    | 0.00E+00 | beta-amyrin synthase<br>[Dorcocheras hygrometricum] |

**Supplementary Table S5** GO terms from biological process ontology for leaf versus root in *C. chinense*.

| Gene Ontology term                            | Genome frequency of use<br>(25024) | Corrected<br>P-value |
|-----------------------------------------------|------------------------------------|----------------------|
| photosynthesis                                | 265 (1.1%)                         | 2.00E-12             |
| cell wall organization or biogenesis          | 688 (2.7%)                         | 1.74E-10             |
| carbohydrate metabolic process                | 2029 (8.1%)                        | 3.61E-10             |
| cellular polysaccharide metabolic process     | 390 (1.6%)                         | 8.81E-10             |
| polysaccharide metabolic process              | 631 (2.5%)                         | 1.13E-09             |
| cell wall macromolecule metabolic process     | 184 (0.7%)                         | 3.28E-09             |
| external encapsulating structure organization | 582 (2.3%)                         | 8.17E-09             |
| cell wall organization                        | 575 (2.3%)                         | 9.96E-09             |
| cellular glucan metabolic process             | 341 (1.4%)                         | 2.33E-08             |

**Supplementary Table S6** GO terms from biological process ontology for stem versus root in *C. chinense*.

| Gene Ontology term                        | Genome frequency of use<br>(25024) | Corrected<br>P-value |
|-------------------------------------------|------------------------------------|----------------------|
| drug catabolic process                    | 332 (1.3%)                         | 5.54e-20             |
| hydrogen peroxide metabolic process       | 153 (0.6%)                         | 6.64e-15             |
| photosynthesis                            | 265 (1.1%)                         | 8.96e-15             |
| hydrogen peroxide catabolic process       | 152 (0.6%)                         | 1.38e-14             |
| cofactor catabolic process                | 201 (0.8%)                         | 7.78e-14             |
| reactive oxygen species metabolic process | 176 (0.7%)                         | 1.13e-13             |
| cell wall organization or biogenesis      | 688 (2.7%)                         | 4.36e-11             |
| cellular polysaccharide metabolic process | 390 (1.6%)                         | 2.63e-10             |
| polysaccharide metabolic process          | 631 (2.5%)                         | 8.29e-10             |

**Supplementary Table S7** GO terms from molecular function ontology for leaf versus root in *C. chinense*.

| Gene Ontology term                           | Genome frequency of use<br>(40108) | Corrected<br>P-value |
|----------------------------------------------|------------------------------------|----------------------|
| oxidoreductase activity                      | 4432 (11.1%)                       | 1.03e-17             |
| structural molecule activity                 | 1459 (3.6%)                        | 1.50e-11             |
| tetrapyrrole binding                         | 959 (2.4%)                         | 4.26e-09             |
| structural constituent of ribosome           | 1200 (3.0%)                        | 6.53e-09             |
| copper ion binding                           | 260 (0.6%)                         | 2.35e-08             |
| xyloglucan:xyloglucosyl transferase activity | 89 (0.2%)                          | 3.28e-08             |
| cofactor binding                             | 2538 (6.3%)                        | 7.60e-07             |
| peroxidase activity                          | 279 (0.7%)                         | 8.42e-07             |
| heme binding                                 | 890 (2.2%)                         | 9.59e-07             |

**Supplementary Table S8** GO terms from molecular function ontology for stem versus root in *C. chinense*.

| Gene Ontology term                                         | Genome frequency of use<br>(40108) | Corrected<br>P-value |
|------------------------------------------------------------|------------------------------------|----------------------|
| oxidoreductase activity                                    | 4432 (11.1%)                       | 2.74e-35             |
| tetrapyrrole binding                                       | 959 (2.4%)                         | 5.17e-16             |
| DNA binding transcription factor activity                  | 1235 (3.1%)                        | 1.11e-13             |
| heme binding                                               | 890 (2.2%)                         | 9.69e-12             |
| cofactor binding                                           | 2538 (6.3%)                        | 3.56e-09             |
| transcription regulator activity                           | 1427 (3.6%)                        | 4.92e-09             |
| oxidoreductase activity, acting on<br>peroxide as acceptor | 295 (0.7%)                         | 1.44e-07             |
| hydrolase activity, hydrolyzing<br>O-glycosyl compounds    | 964 (2.4%)                         | 5.69e-07             |
| peroxidase activity                                        | 279 (0.7%)                         | 9.09e-07             |

**Supplementary Table S9** RNA information of different tissues.

| Sample | Concentration<br>(ng/ $\mu$ L) | Total amount<br>( $\mu$ g) | OD260/280 | RIN | 28S/18S |
|--------|--------------------------------|----------------------------|-----------|-----|---------|
| Leaves | 395                            | 11.85                      | 2.03      | 7.5 | 1.6     |
| Roots  | 497                            | 14.91                      | 2.00      | 8.0 | 1.5     |
| Stems  | 226                            | 6.78                       | 1.99      | 9.5 | 1.7     |

**Supplementary Table S10** Genes and primer sequences used for RT-qPCR.

| Gene ID          | Primers (bp)                | Length (bp) | T <sub>m</sub> (°C) |
|------------------|-----------------------------|-------------|---------------------|
| CL2016.Contig3   | 5'-TTGACCATGGAGCACAGAGT-3'  | 20          | 56.2                |
|                  | 5'-TAGAACAAACAGTCGCTGCAA-3' | 20          | 55.1                |
| CL10703. Contig3 | 5'-TGGACCACAGACACTCGACA-3'  | 20          | 55.9                |
|                  | 5'-ACCTGATCAGCTAGGAGGGA-3'  | 20          | 57.3                |
| CL10042.Contig3  | 5'-AACTTCAGAAAGGAGTGGCA-3'  | 20          | 54.7                |
|                  | 5'-ATCTCGGTGAAGCACACCTC-3'  | 20          | 57.1                |
| CL8457.Contig10  | 5'-ATAAAGTCATCATTGGGGGC-3'  | 20          | 56.5                |
|                  | 5'-TTGGTAGTGGTTTTGACGTG-3'  | 20          | 54.1                |
| CL10625.Contig5  | 5'-TTCTCCGCTTAAATCTCTCC-3'  | 20          | 54.1                |
|                  | 5'-ATGGAGTTGGATTTGGATT-3'   | 20          | 53.6                |
| CL7015.Contig4   | 5-GTACGAAGTCAACTGCGTTA-3'   | 20          | 51.3                |
|                  | 5'-GGTGATGCATTGTTCCCTCT-3'  | 20          | 57.0                |
| $\beta$ -actin   | 5'-ACGAGCTTCCTGATGGACAA-3'  | 20          | 56.2                |
|                  | 5'-TTCCAGCAGCTTCCATACCA-3'  | 20          | 56.3                |
